# Supplementary material for: Sparse Distributed Representation of Odors in a Large-scale Olfactory Bulb Circuit
Source: PubMed Central journal article supplement (PMC3610624; doi:10.1371/journal.pcbi.1003014), 2013-03-28

**A**

3COOH

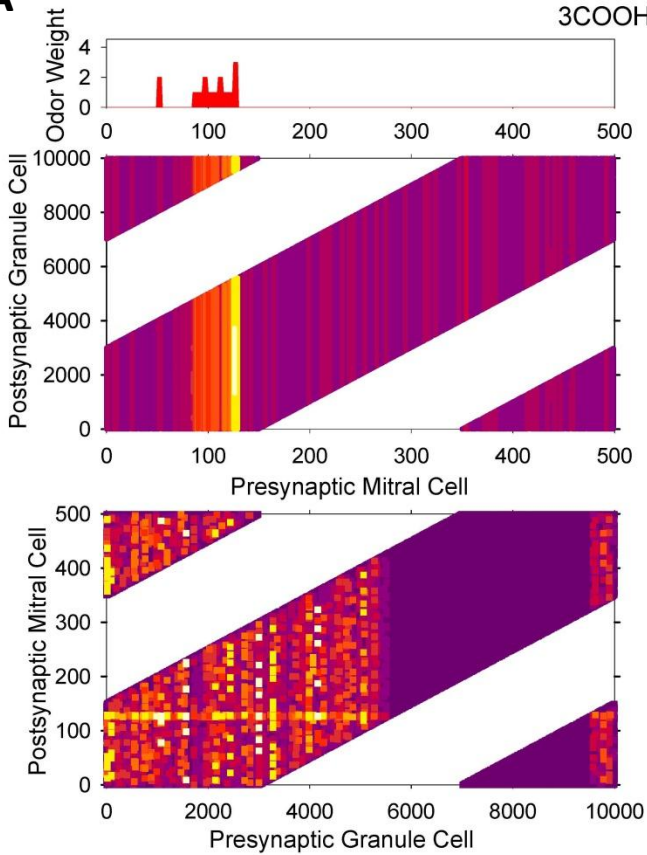**B**

4COOH

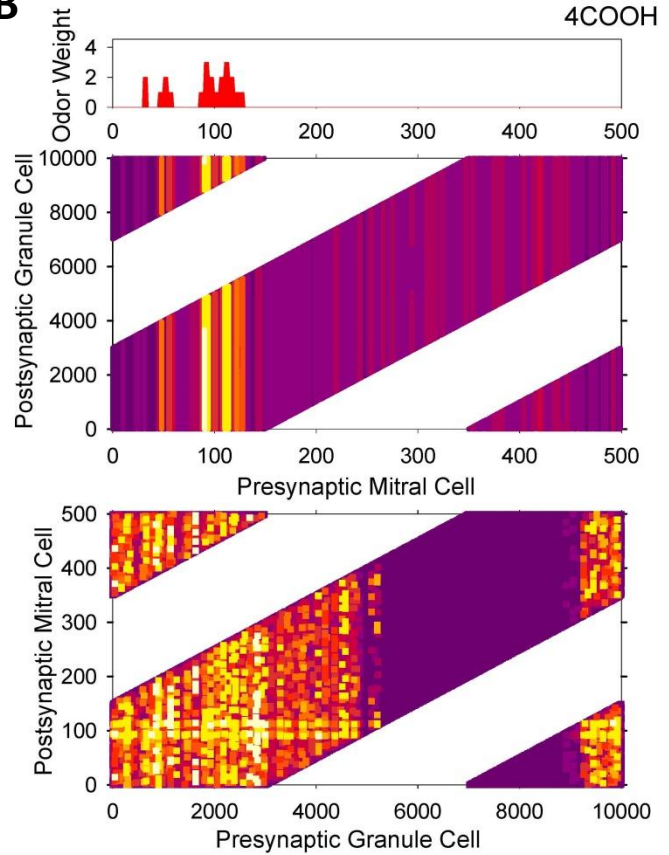**C**

5COOH

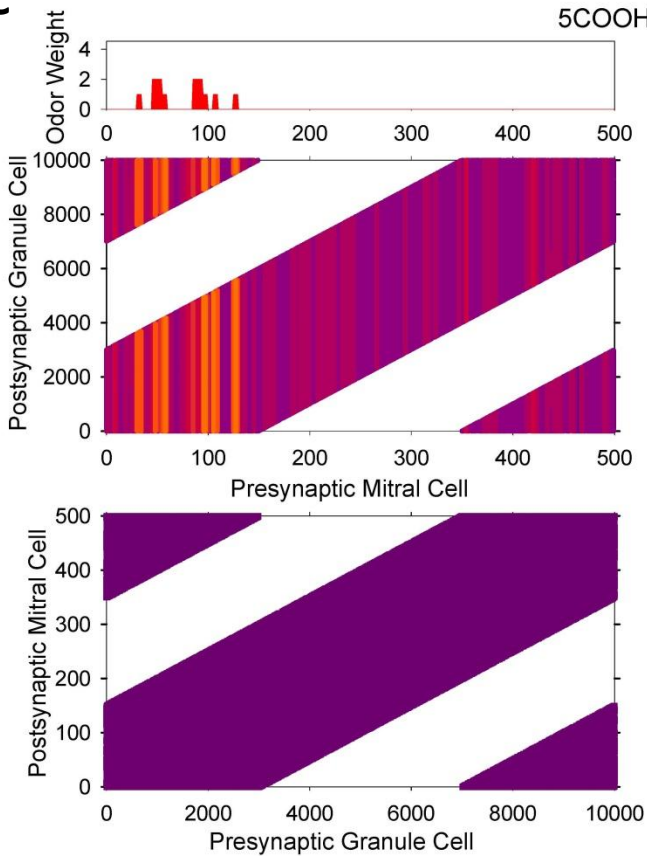**D**

6COOH

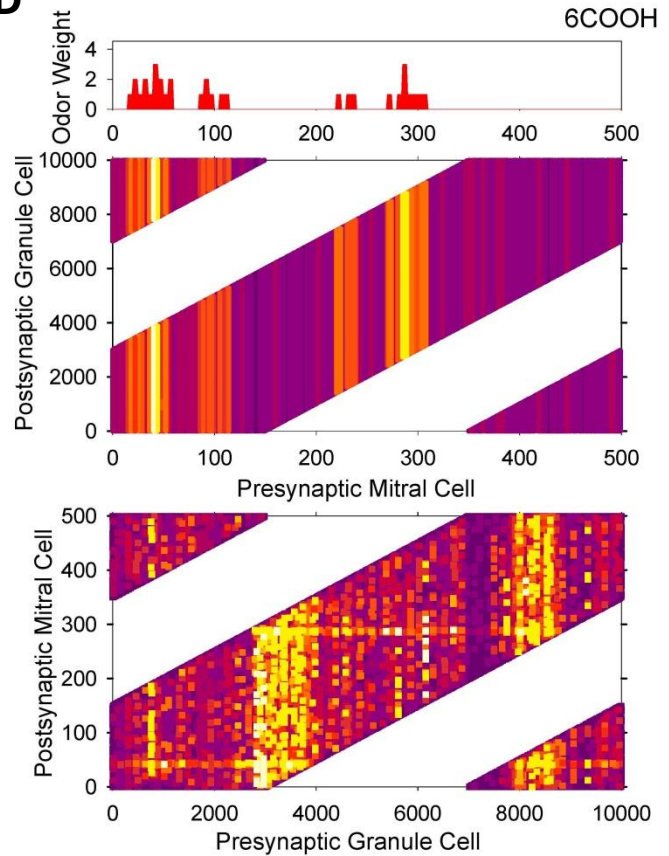

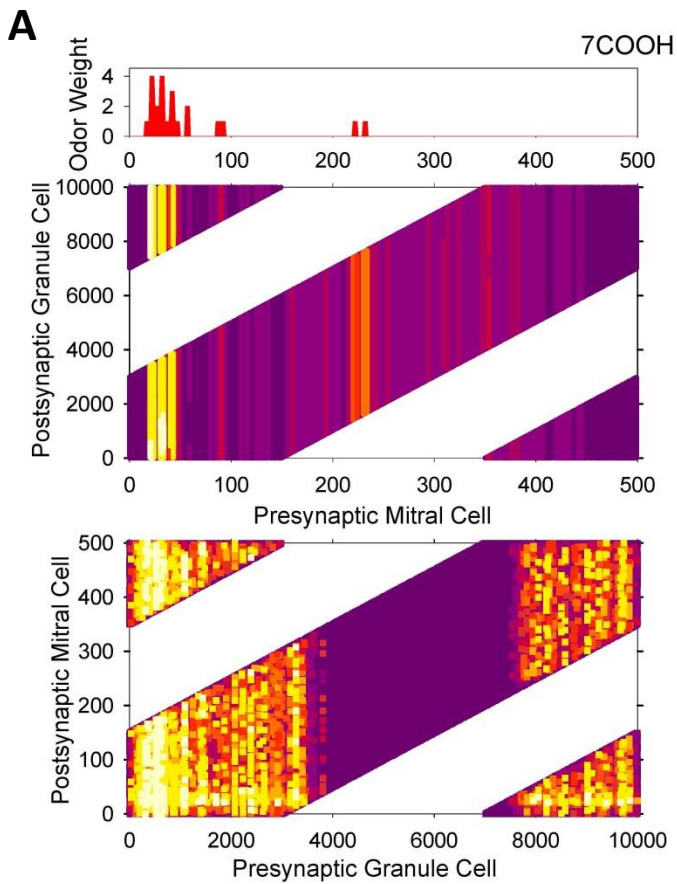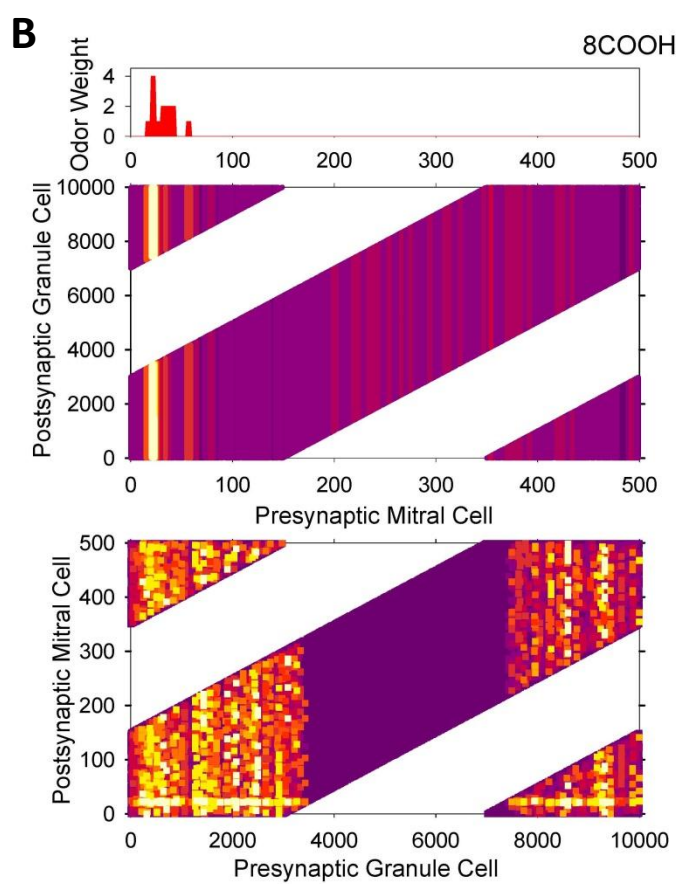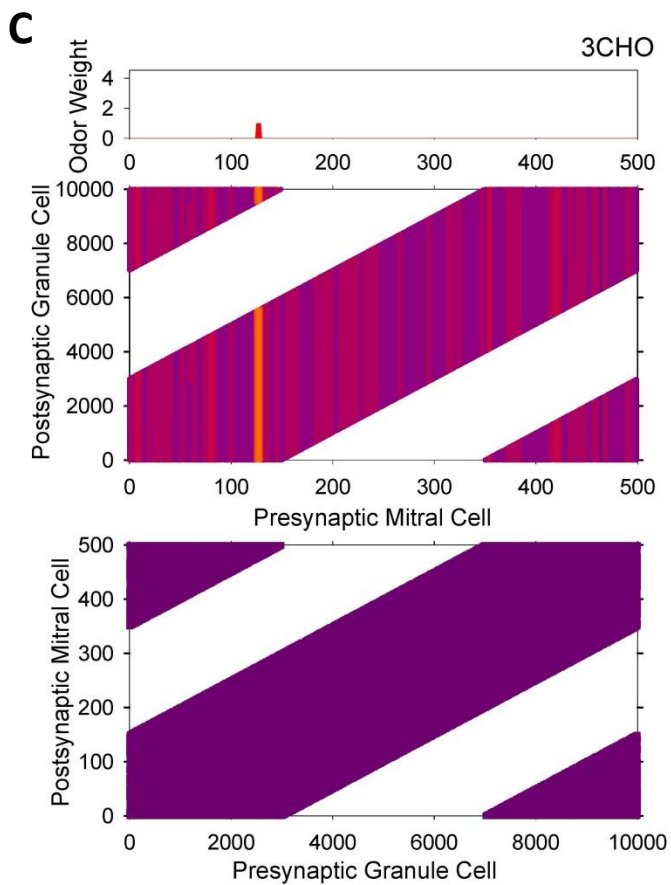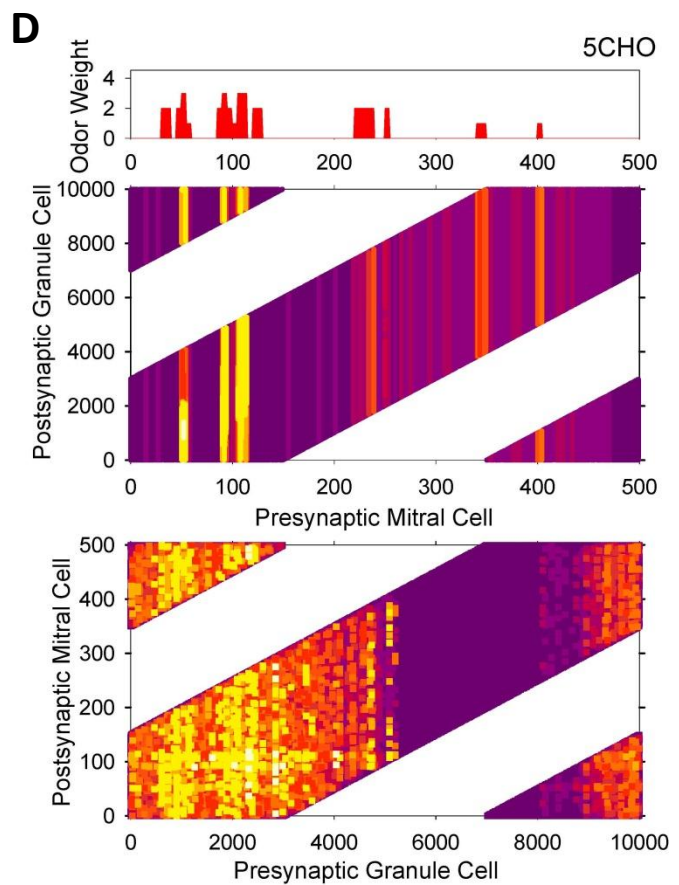

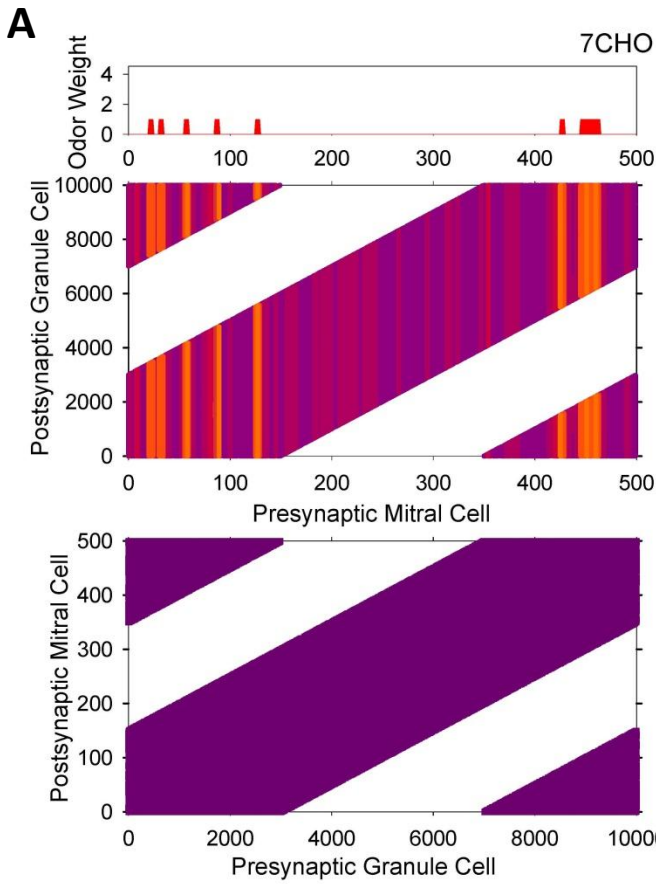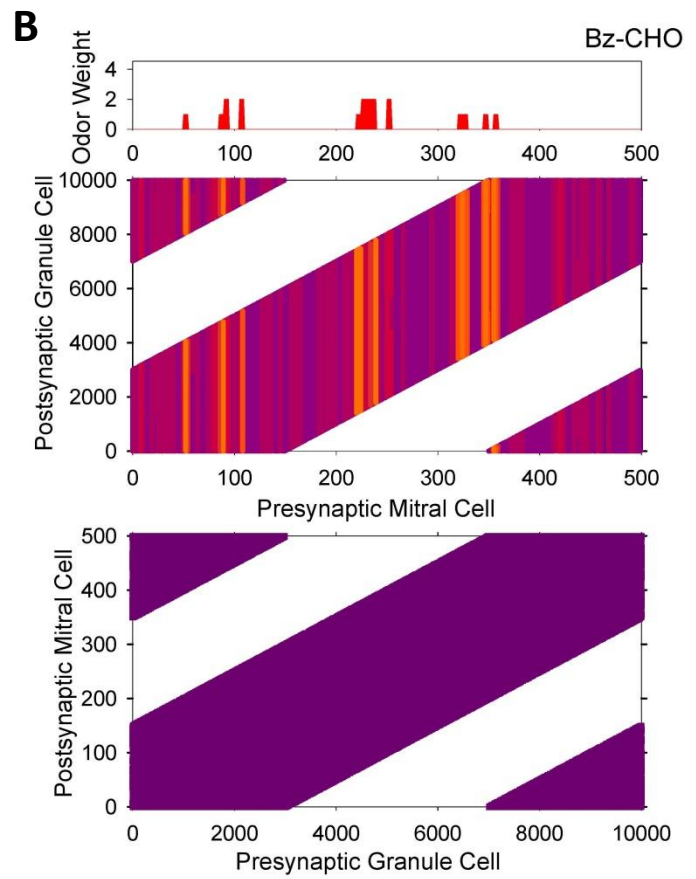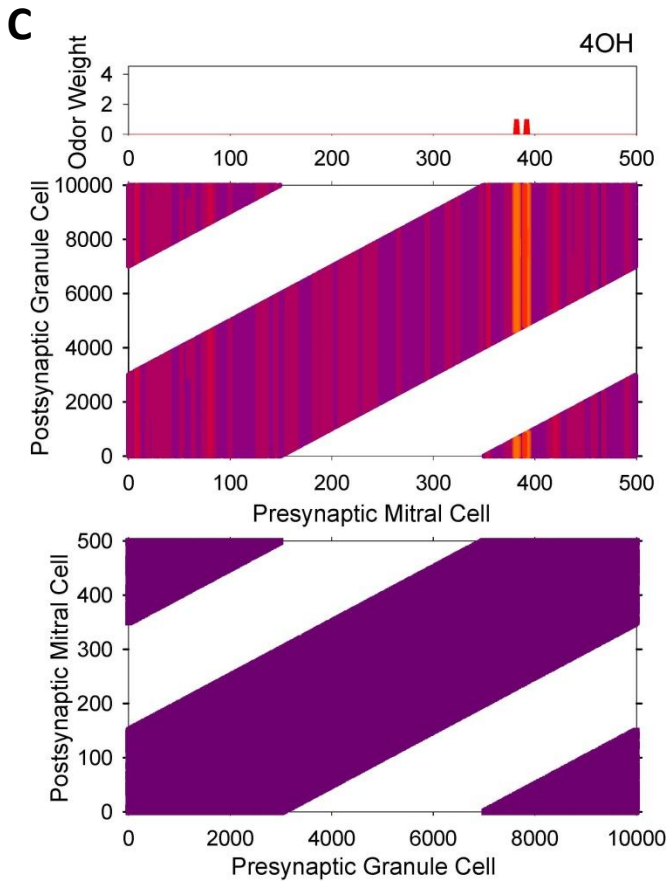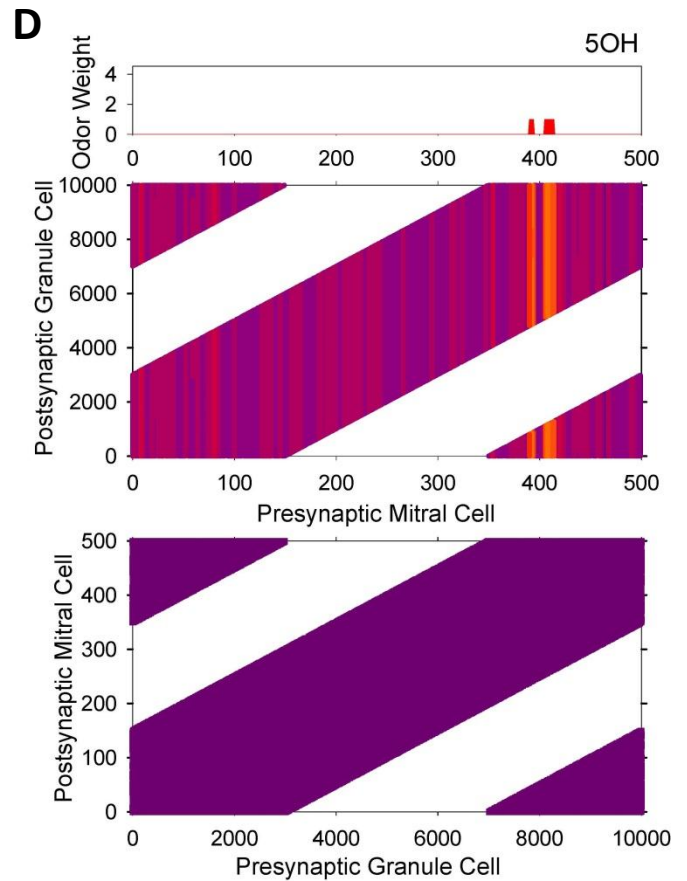

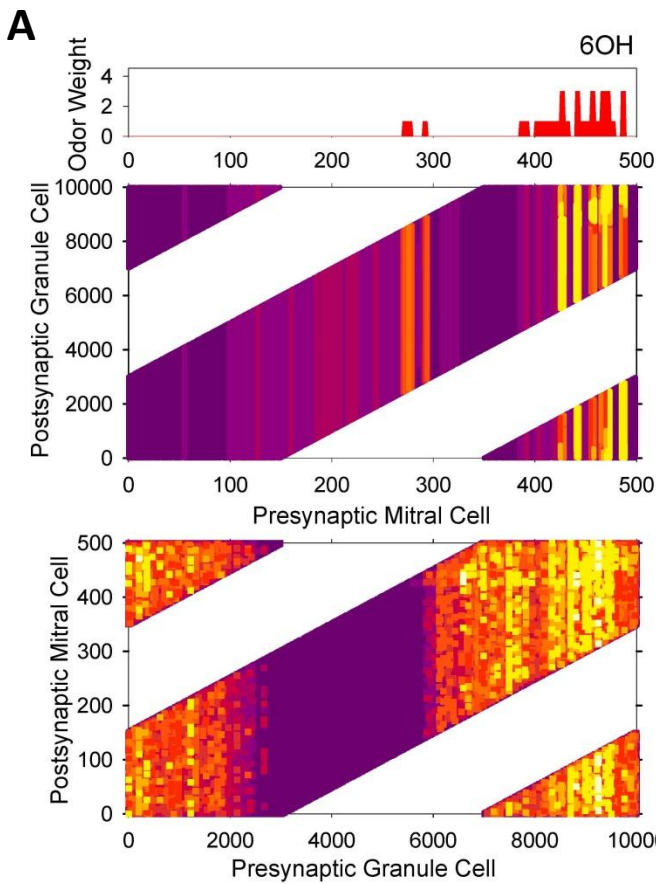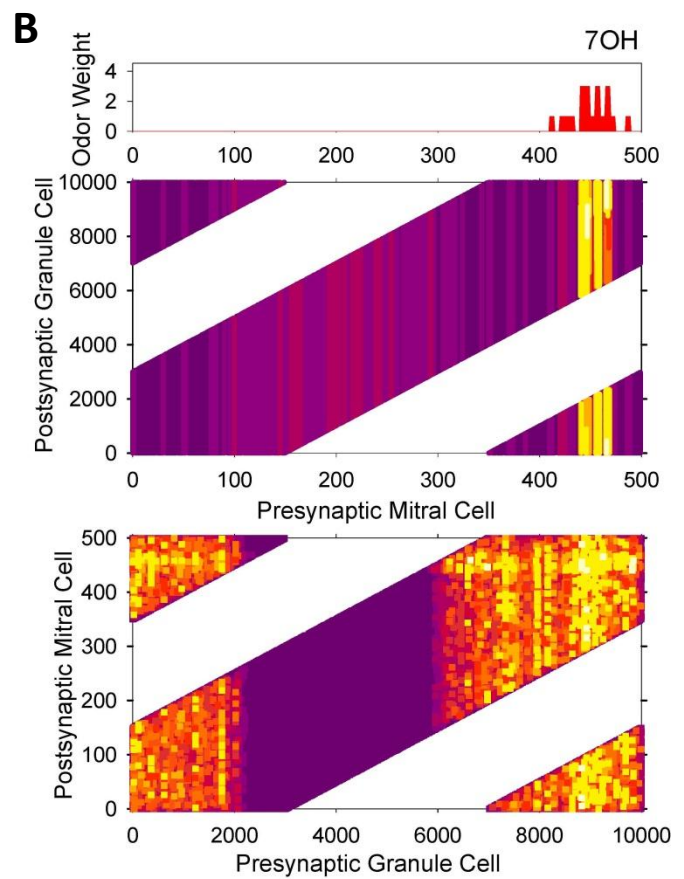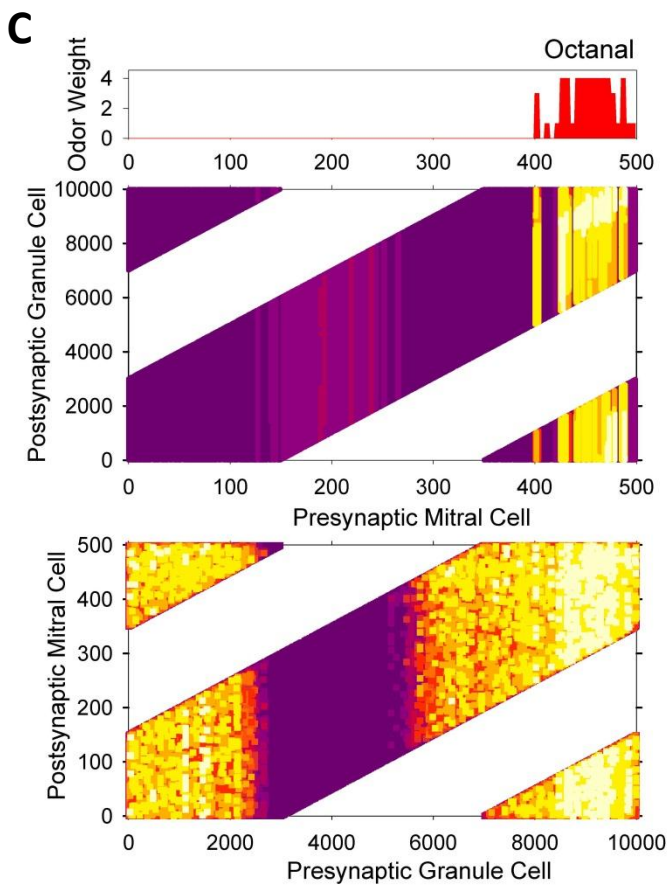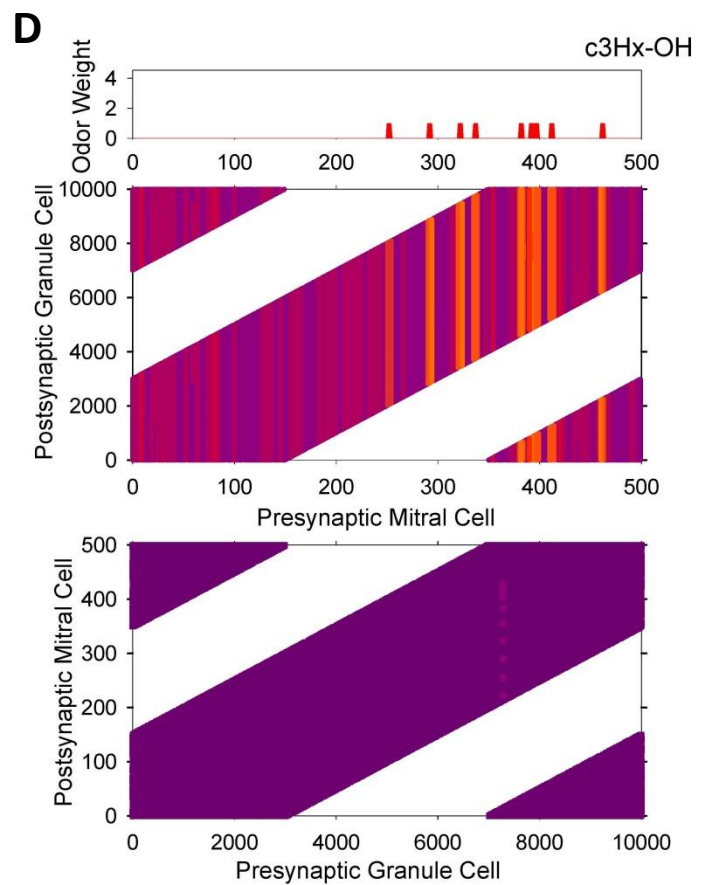

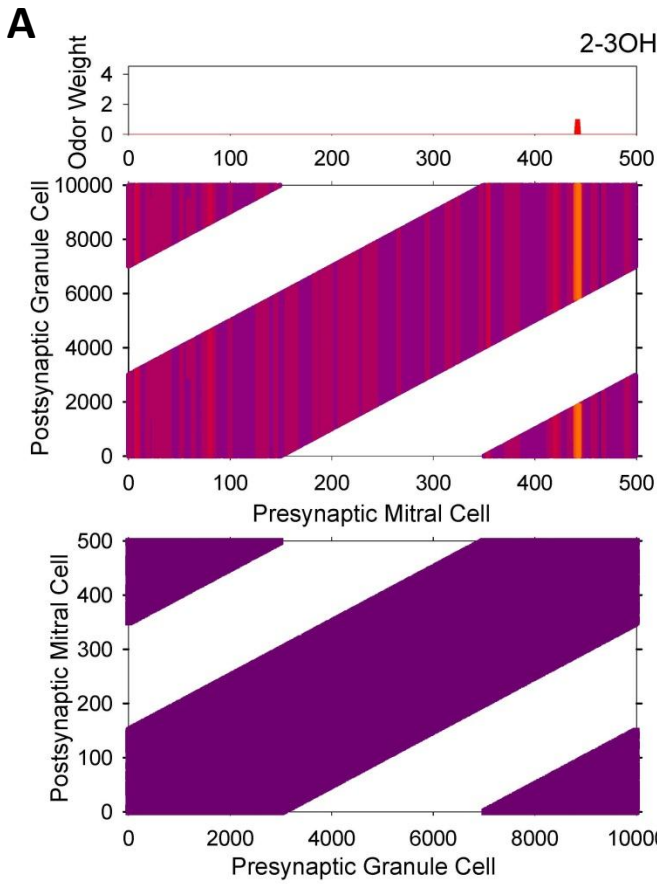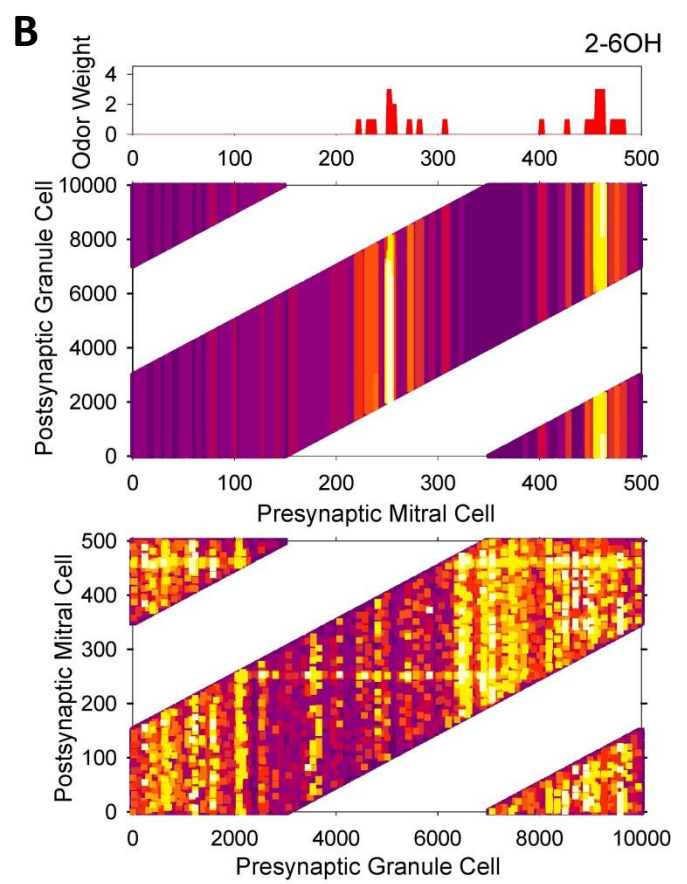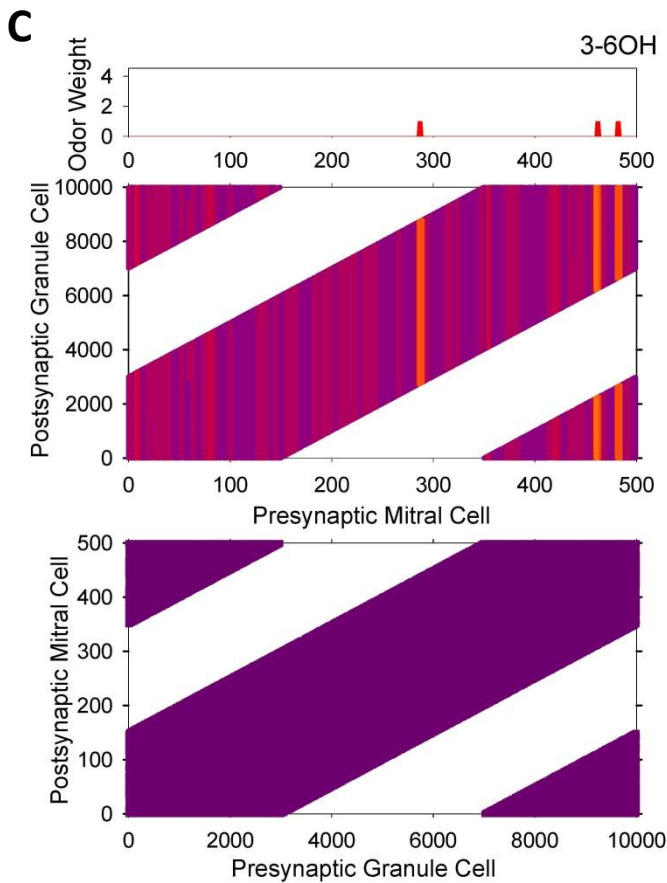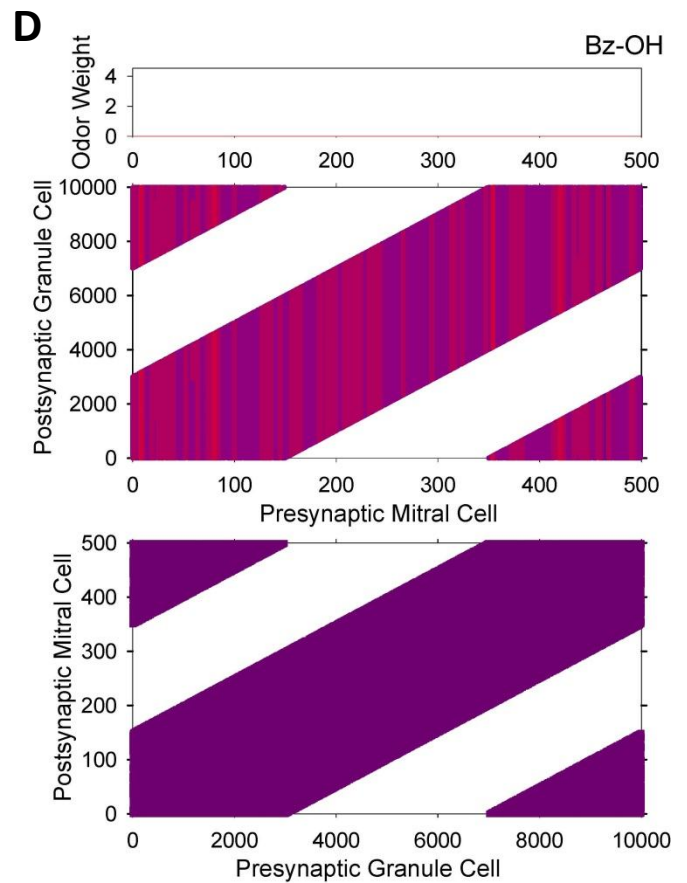

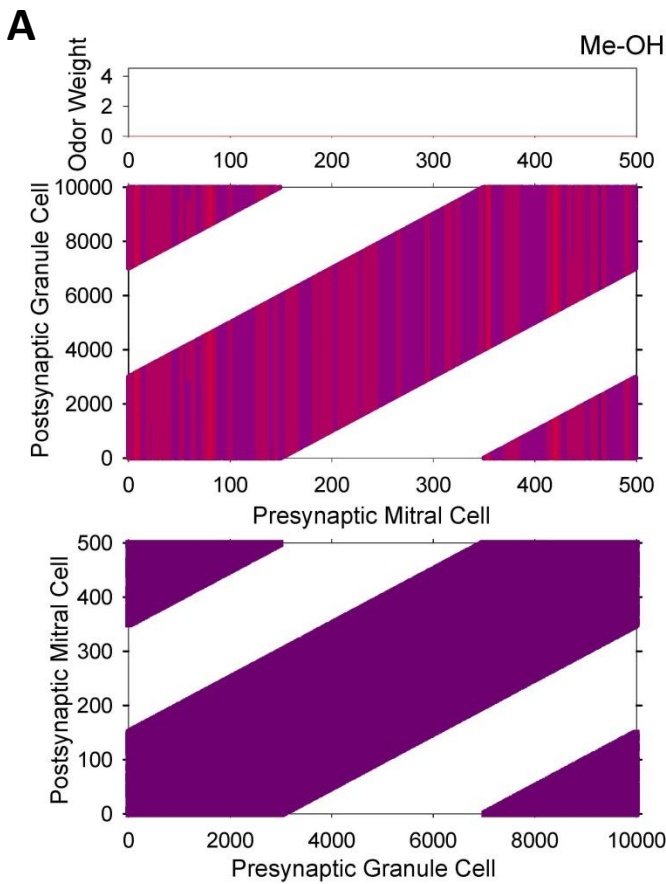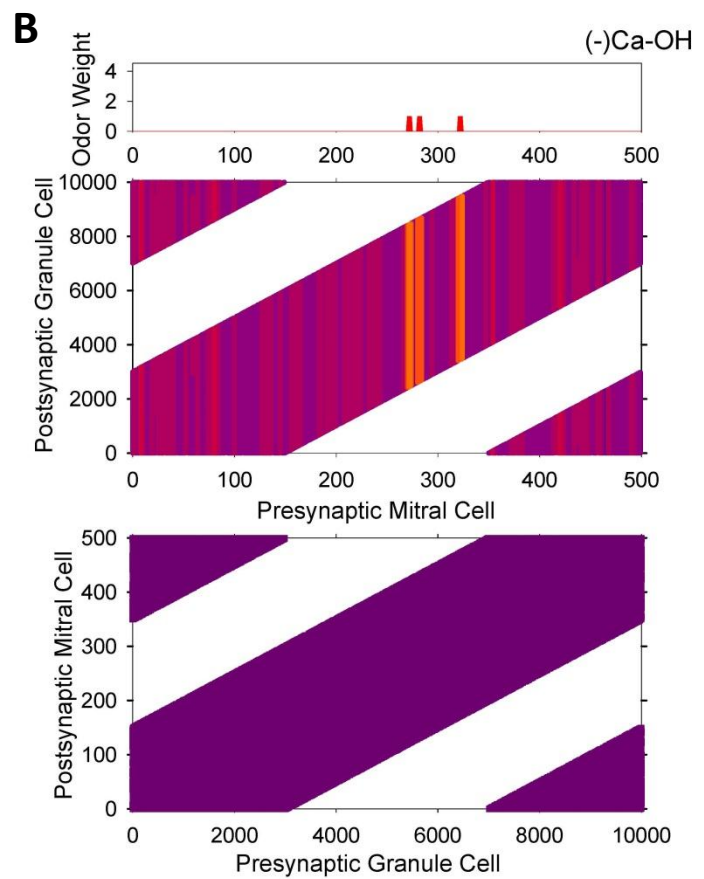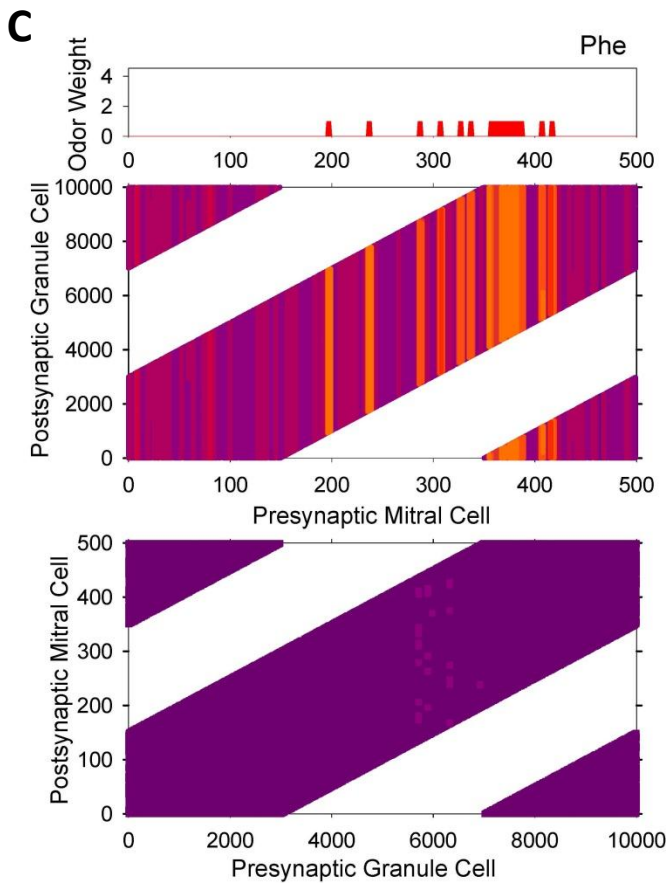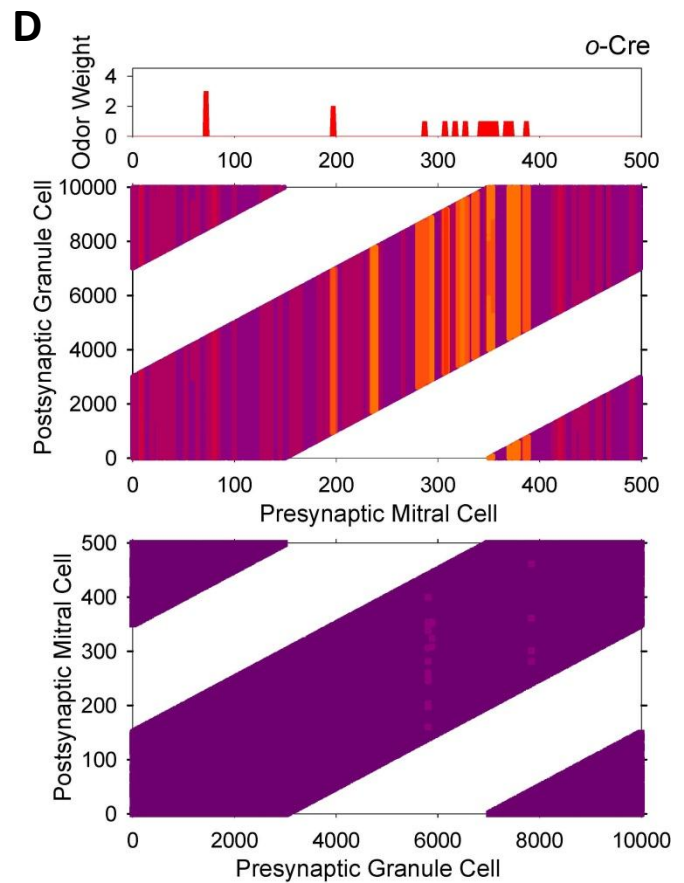

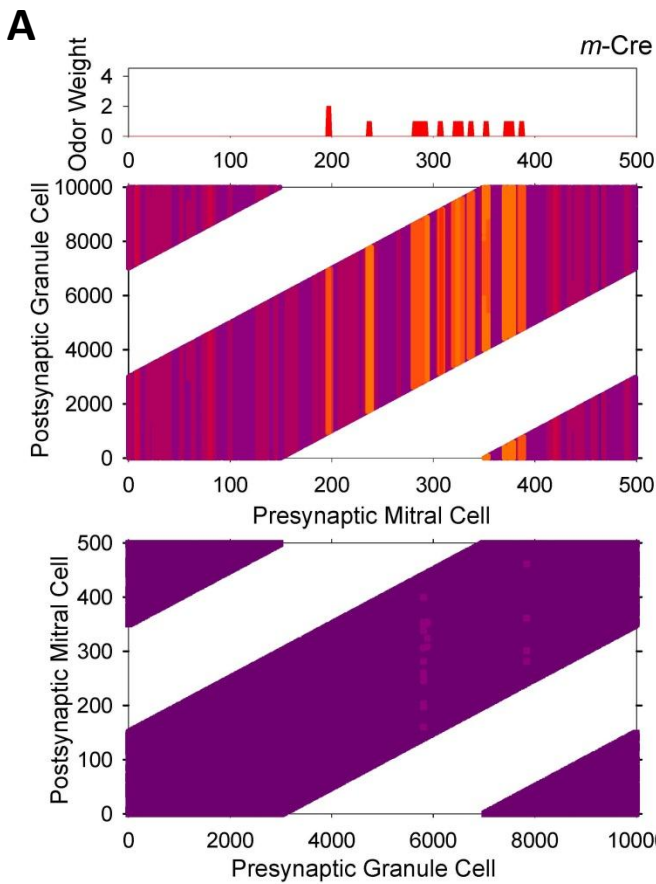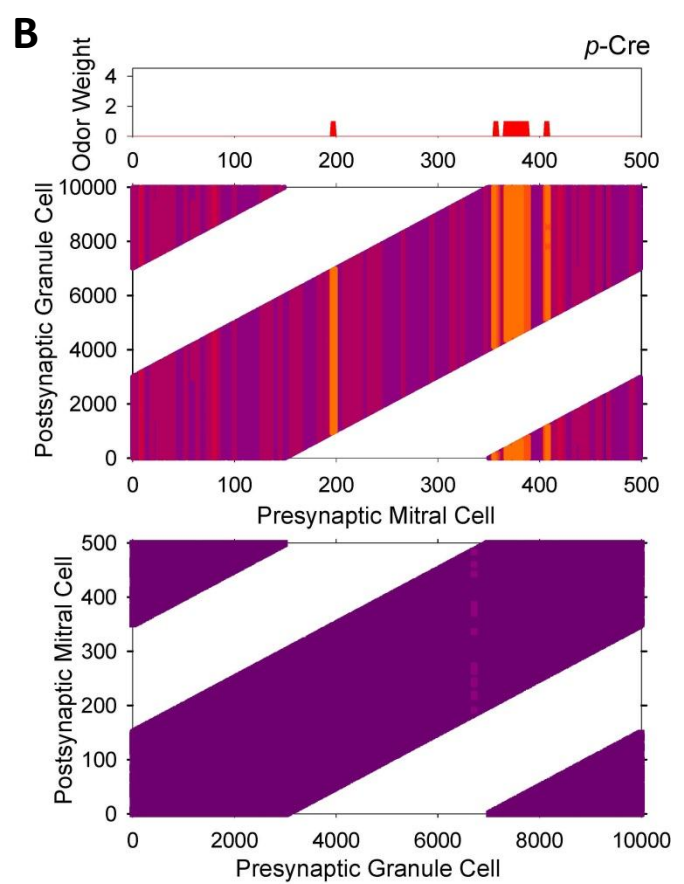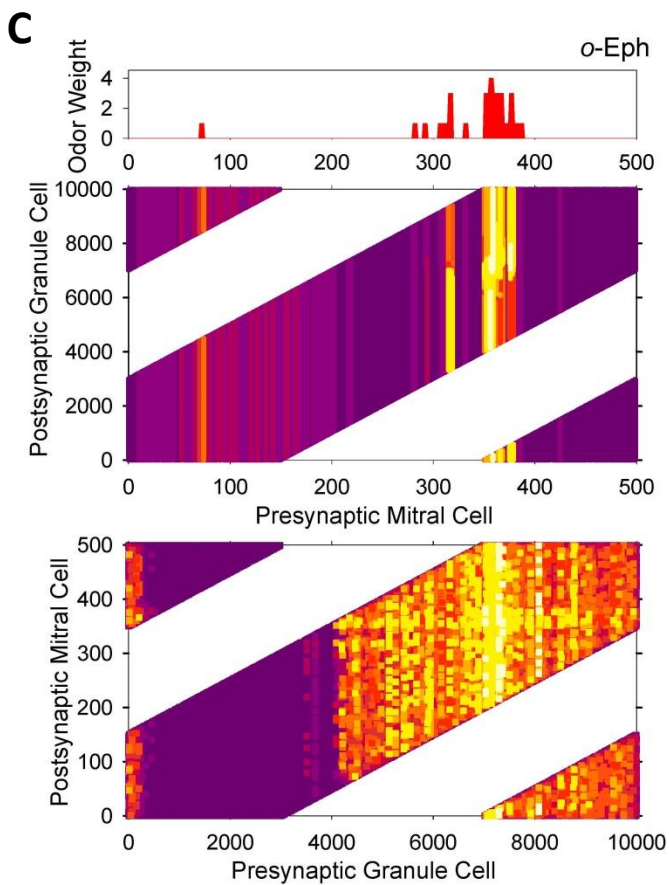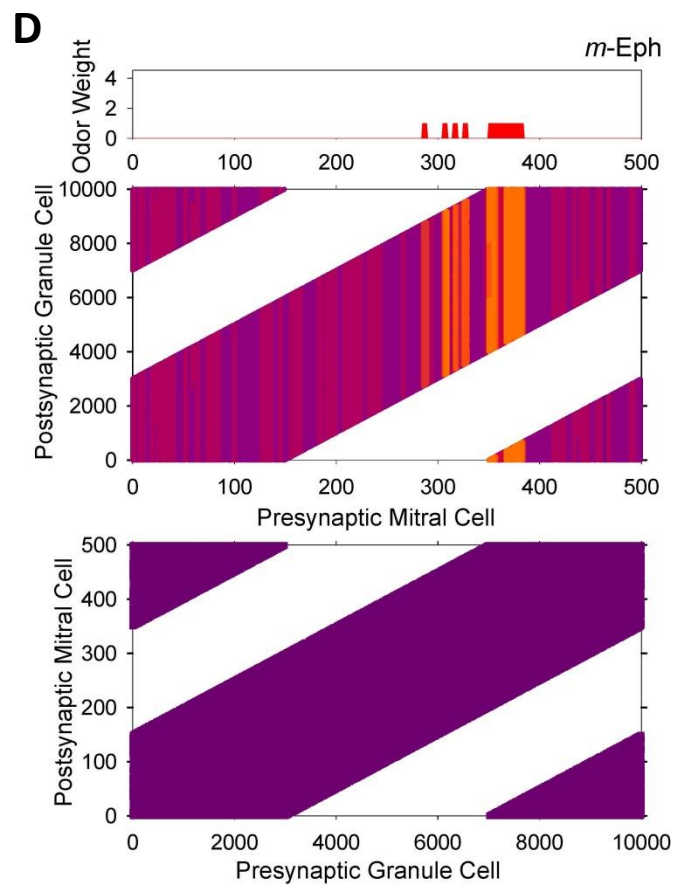

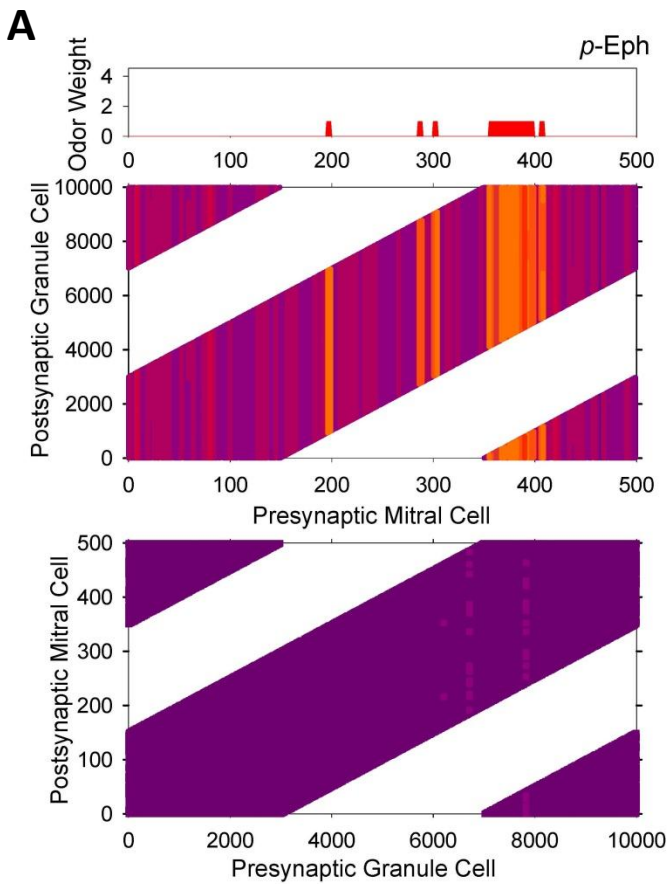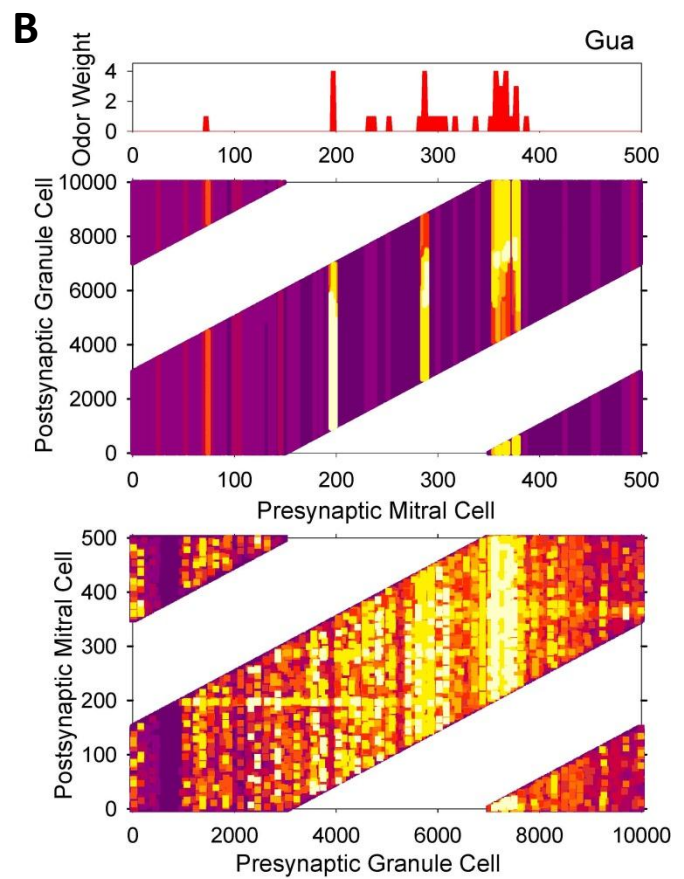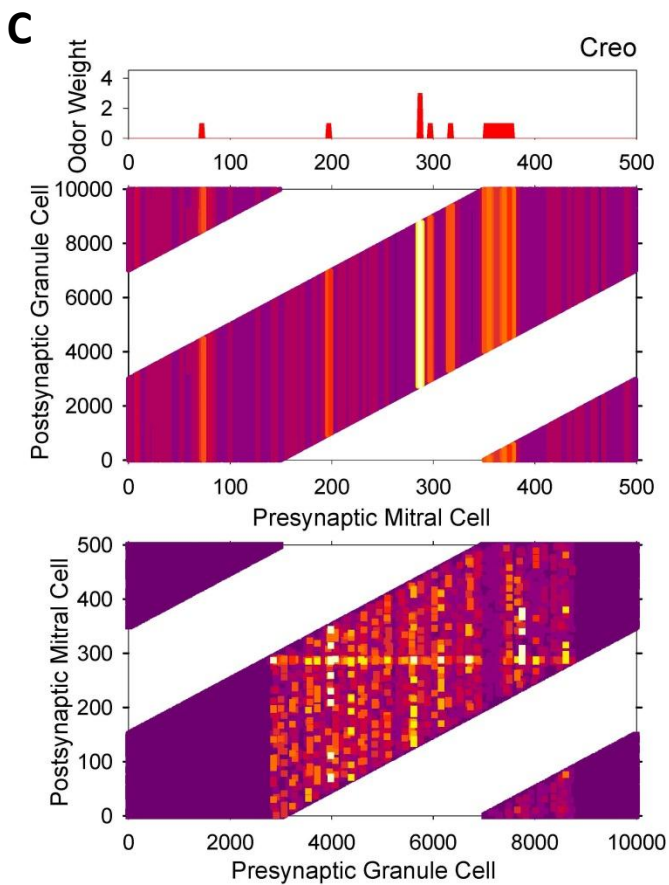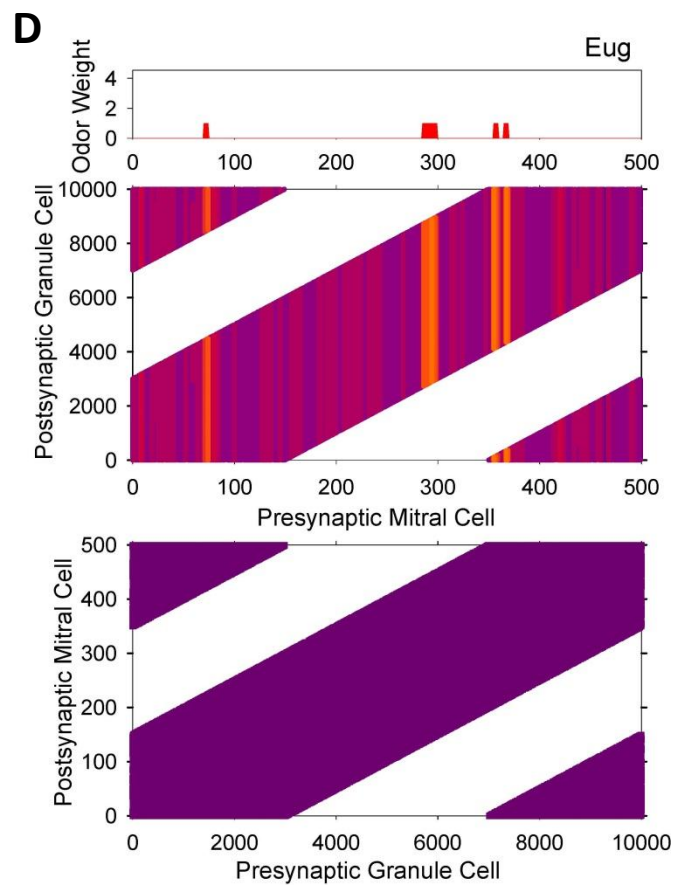



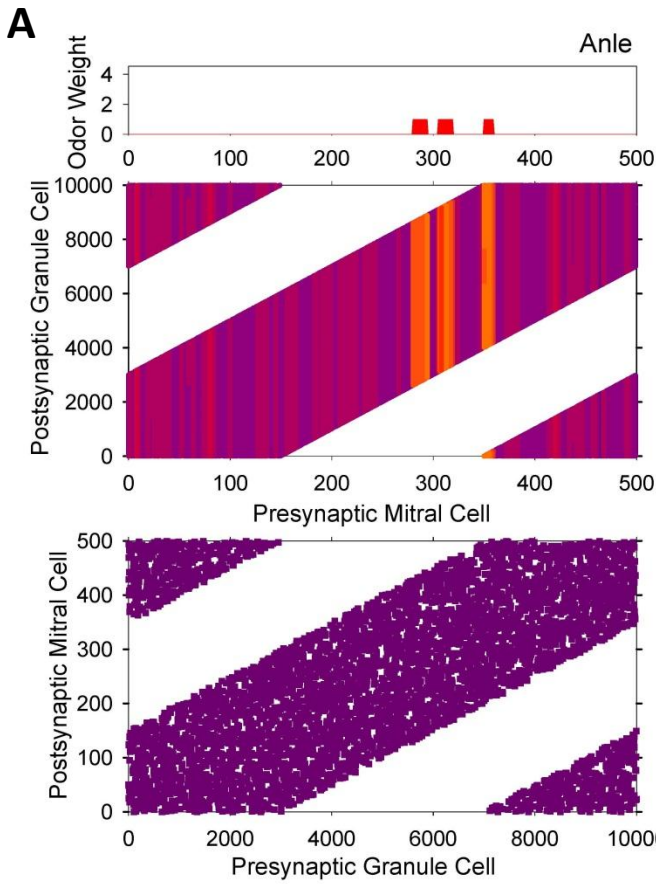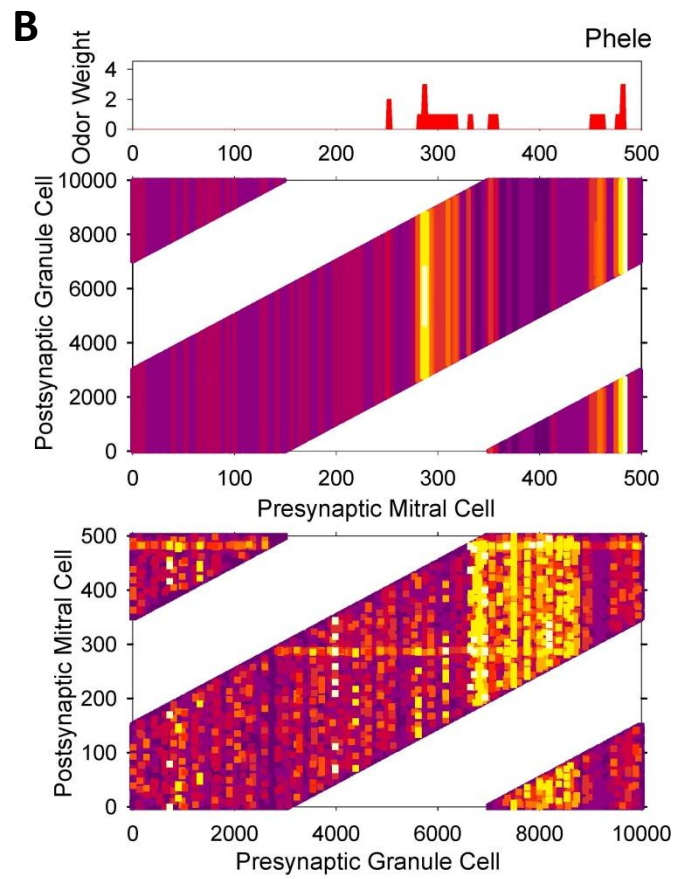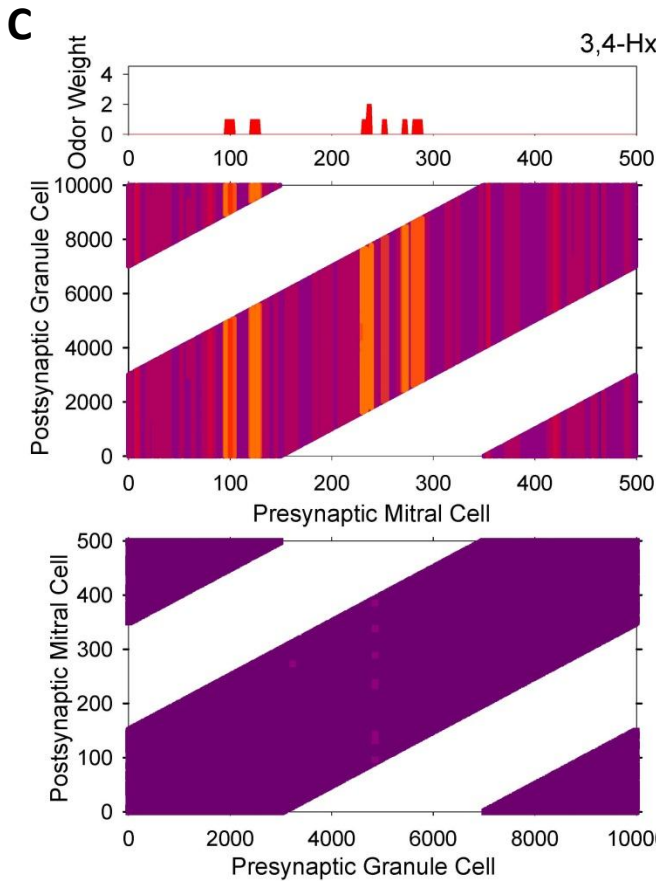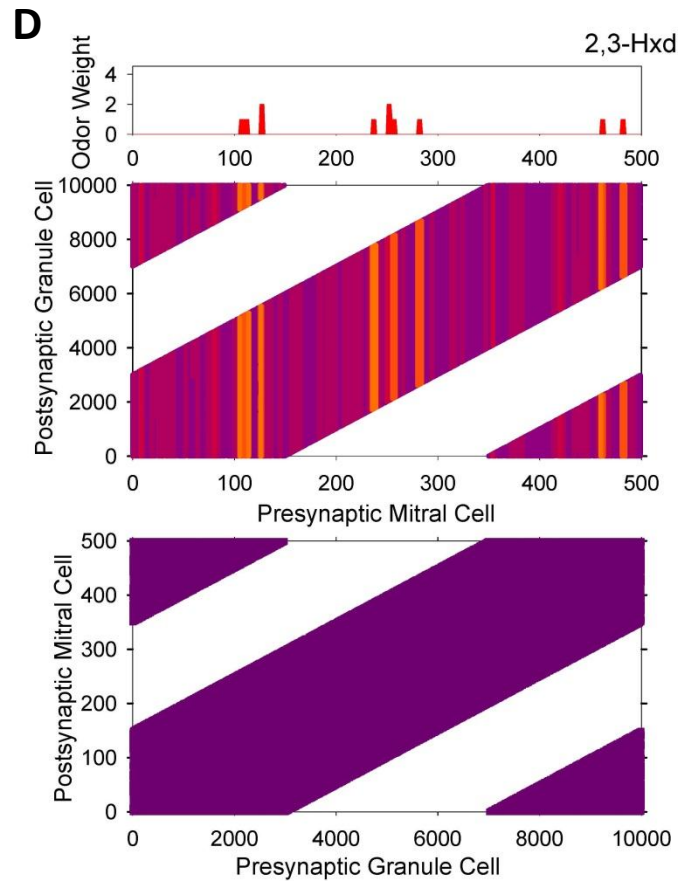

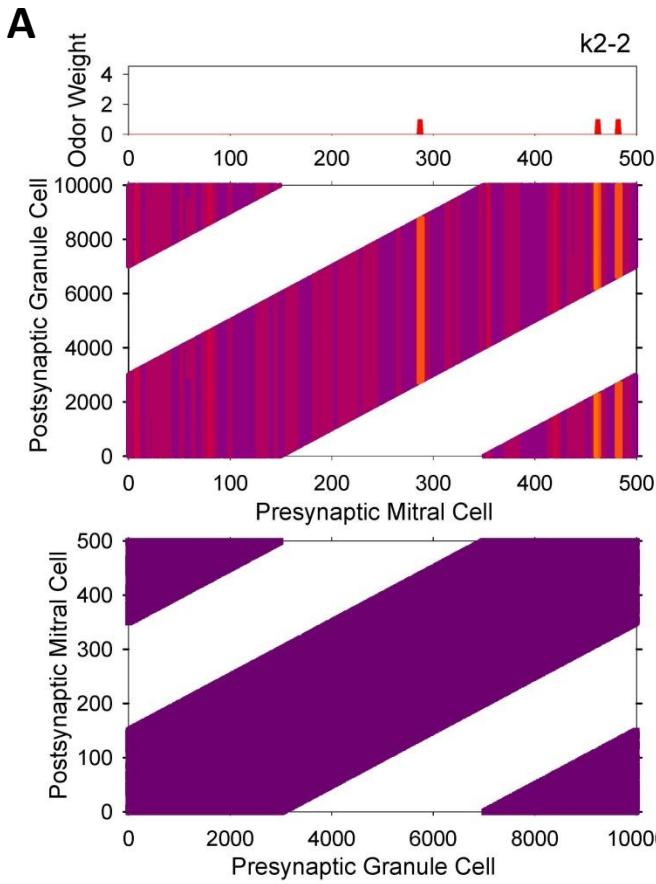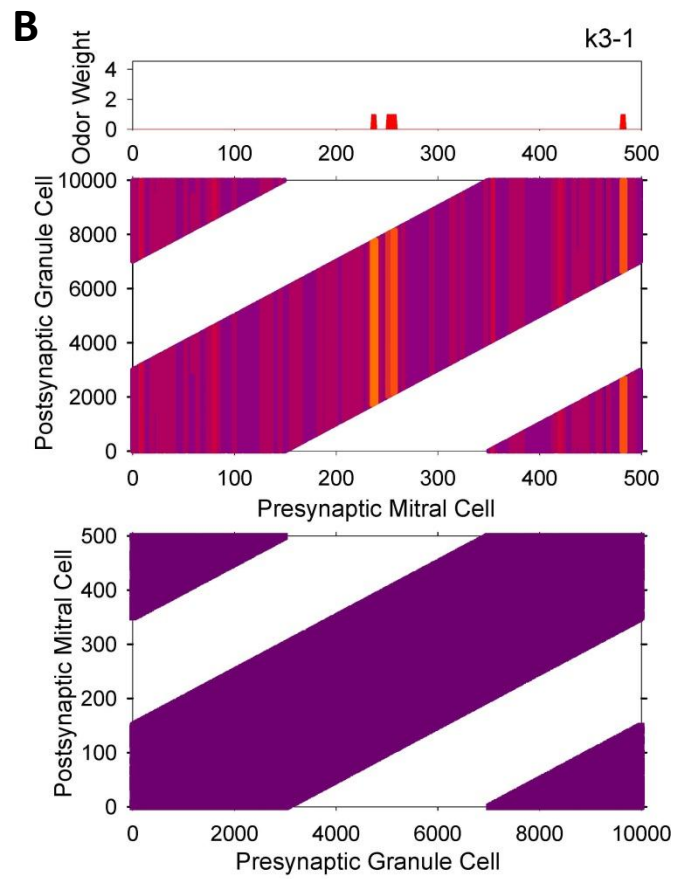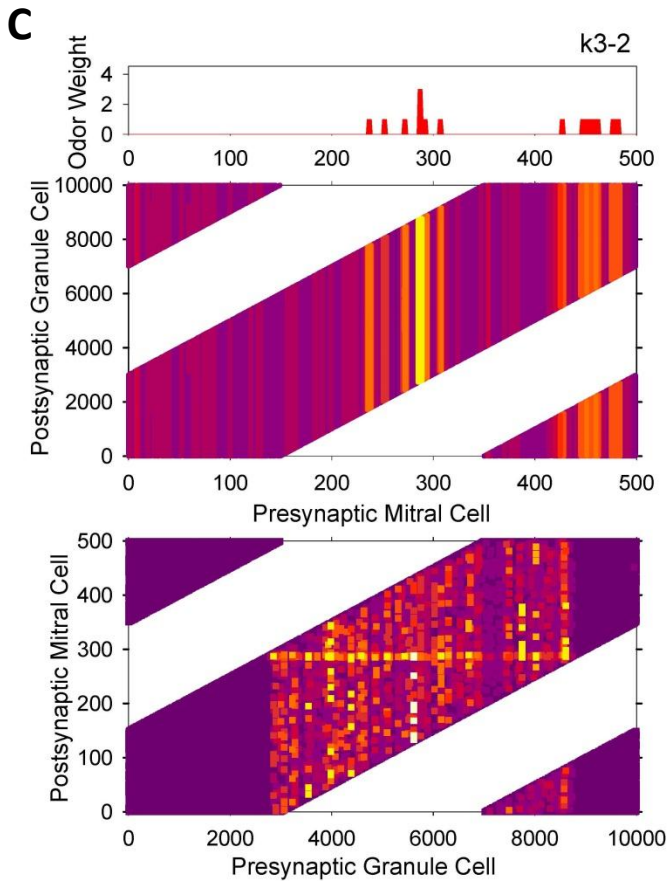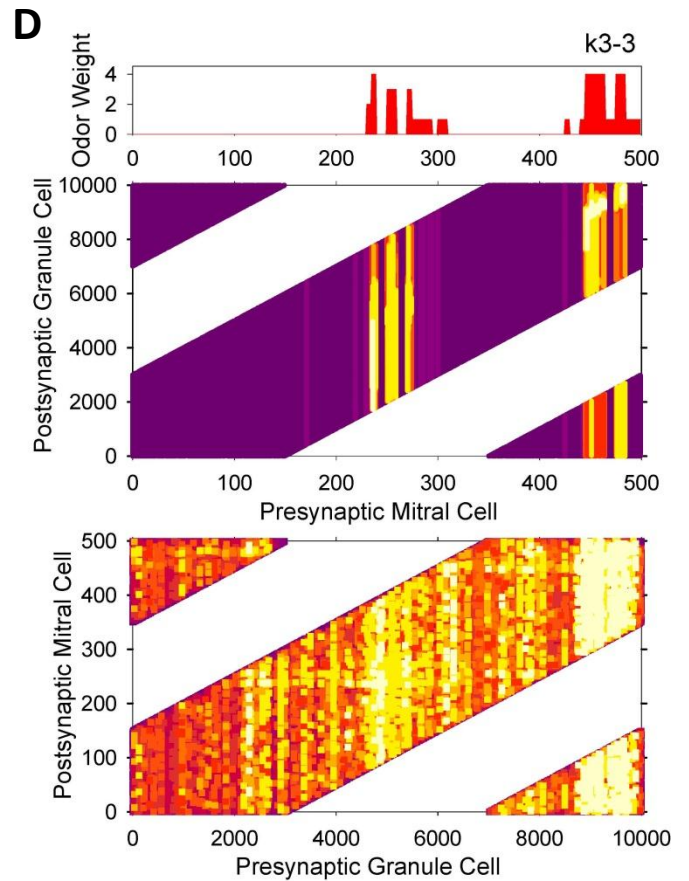

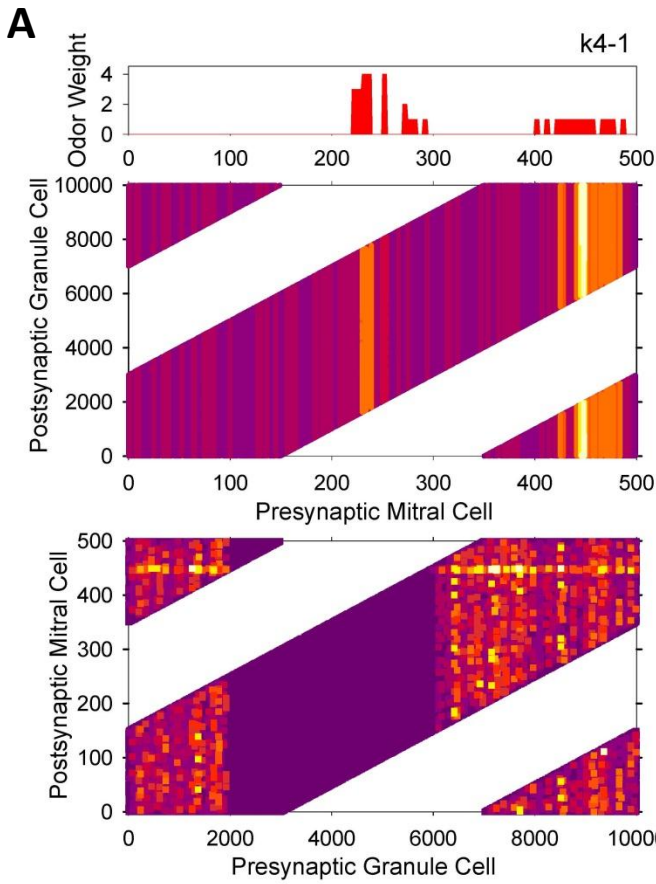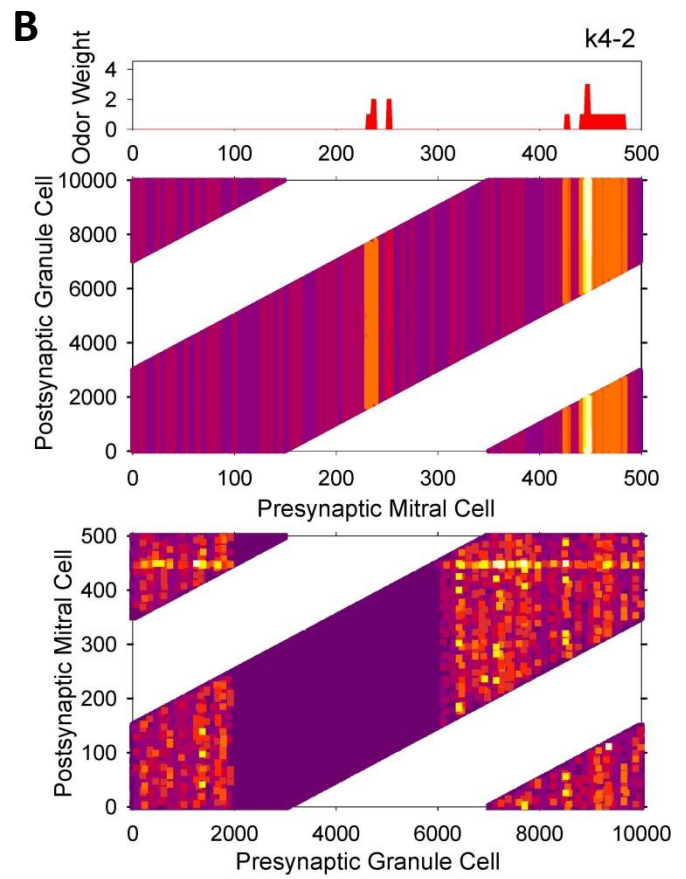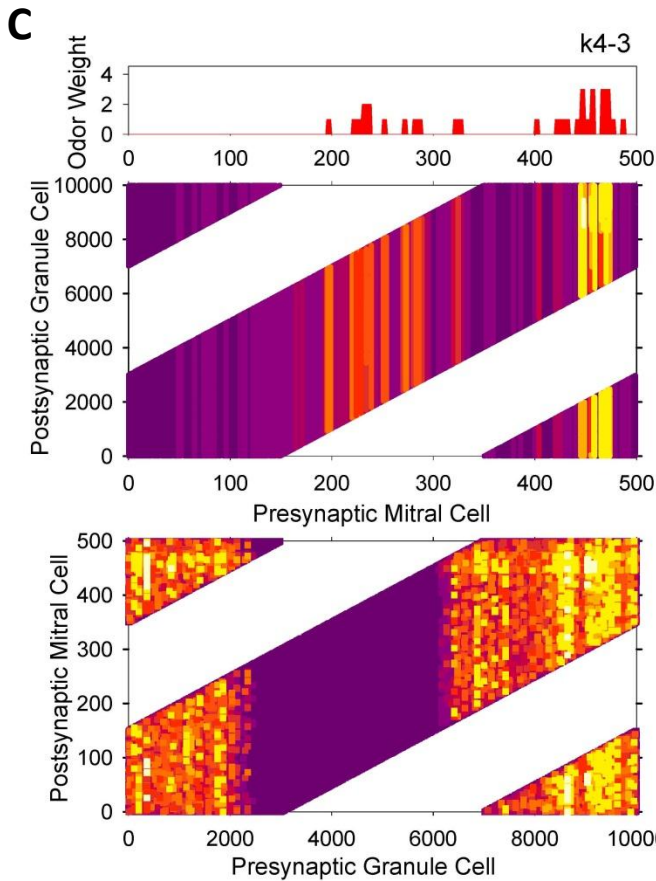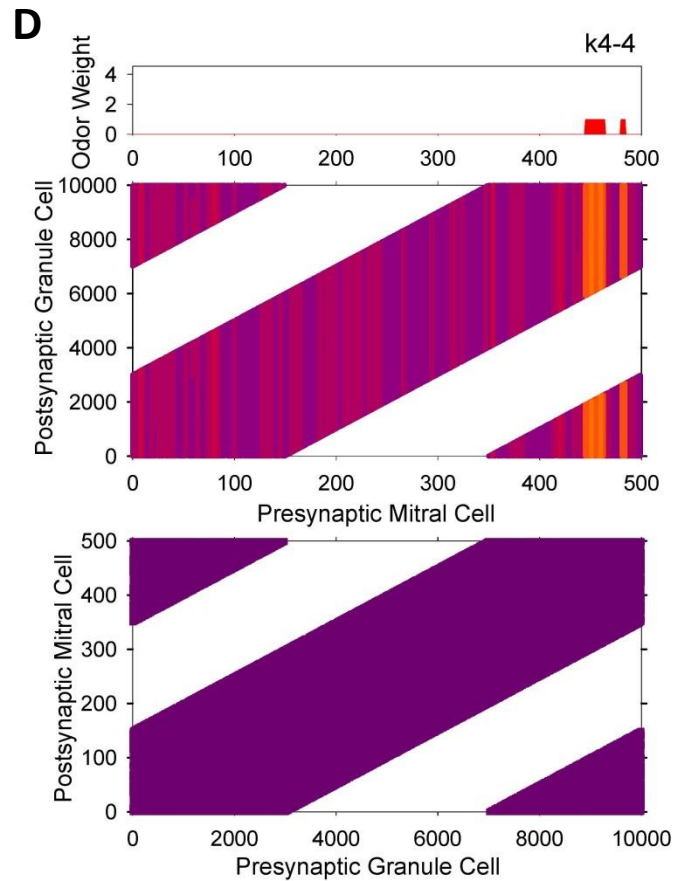

**A**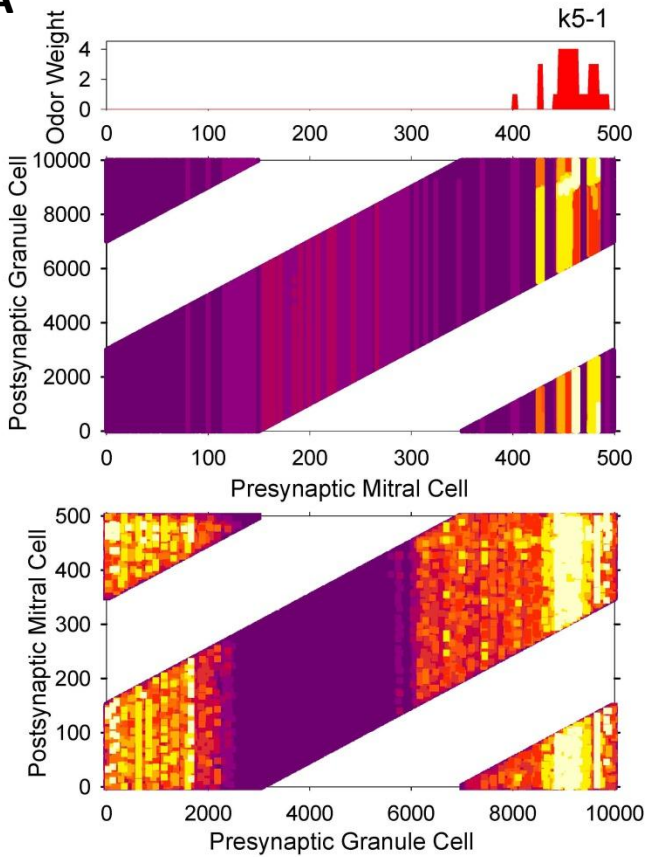**B**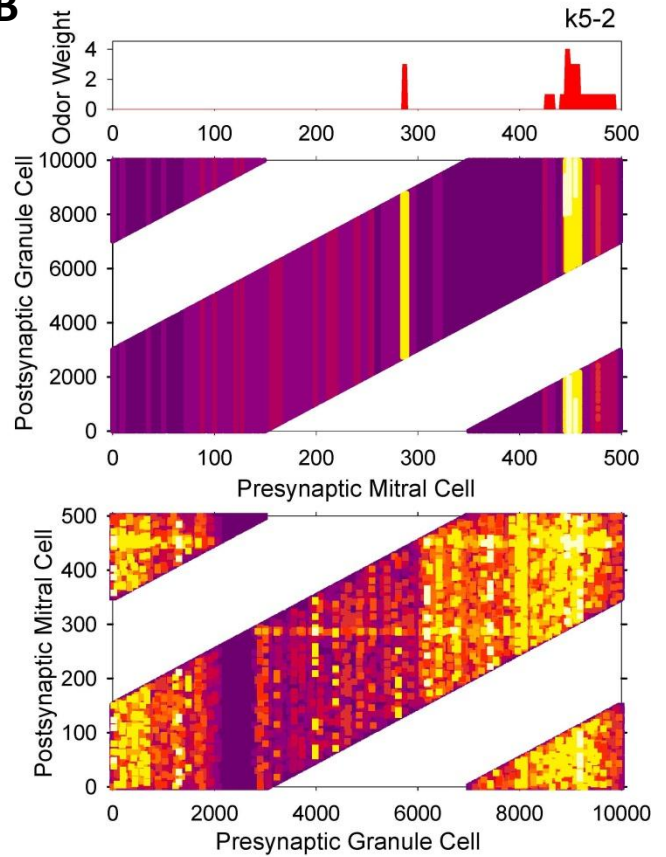**C**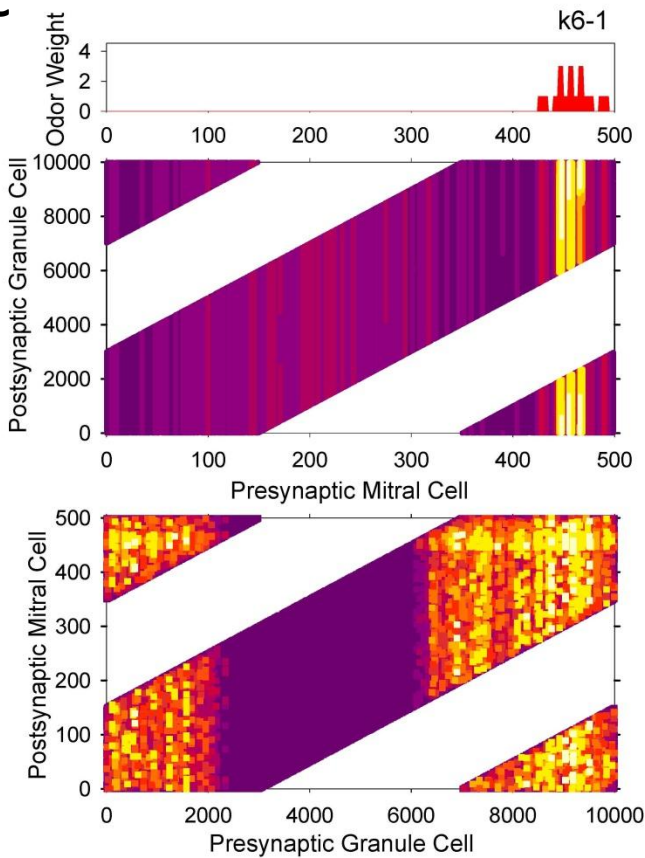**D**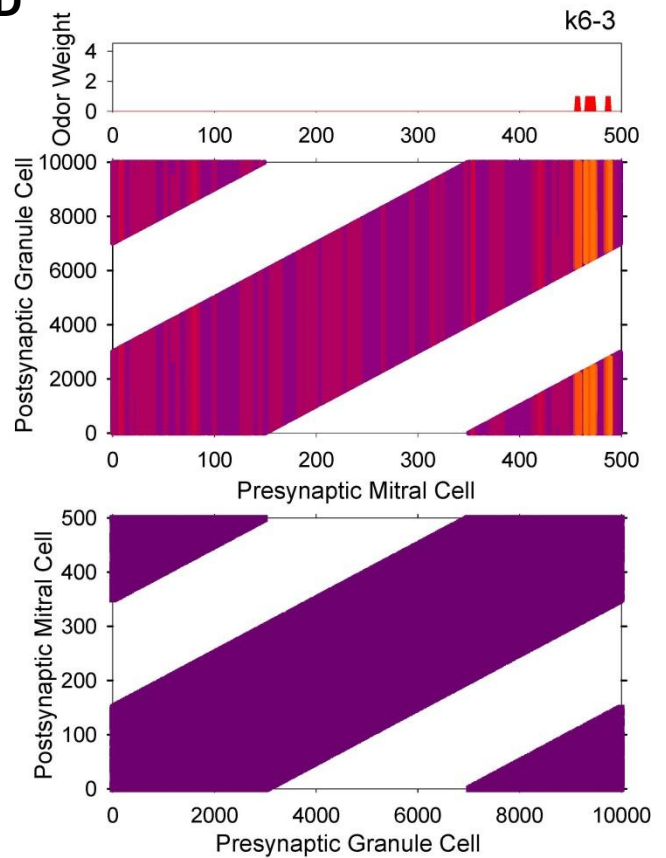

**A**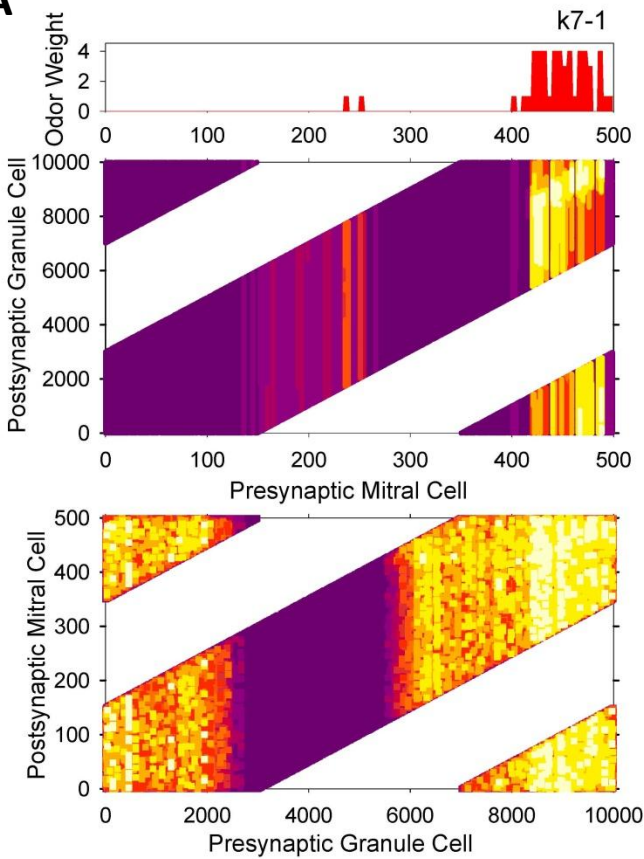**B**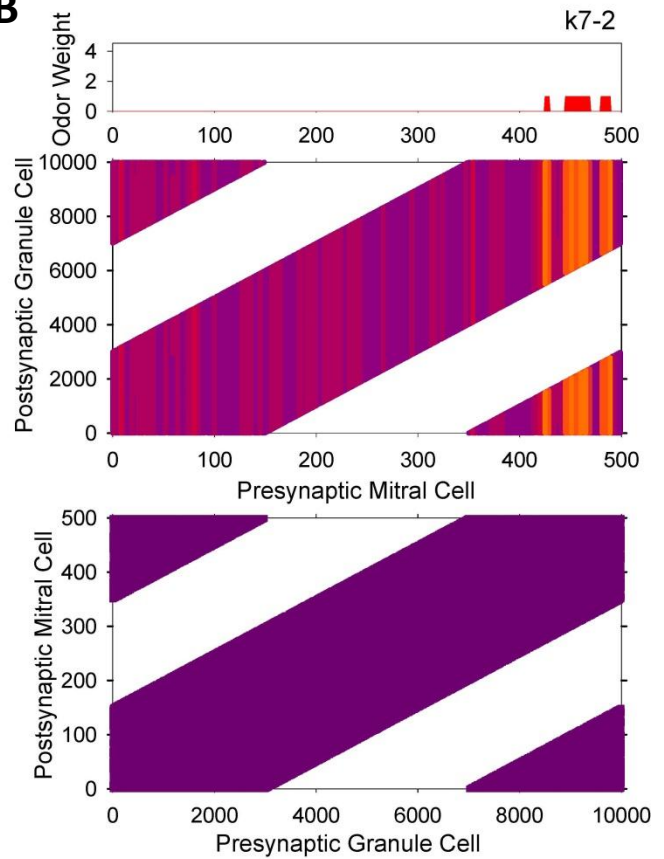**C**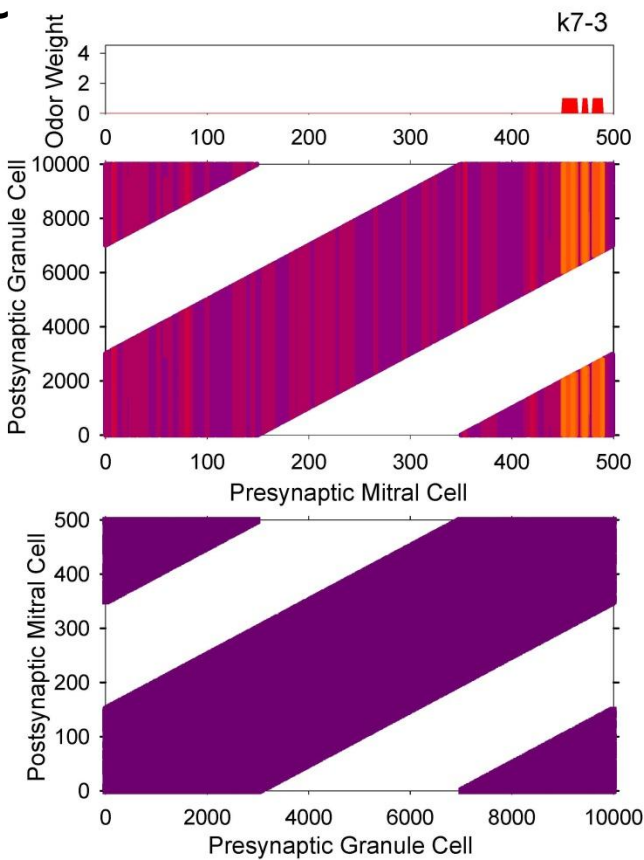**D**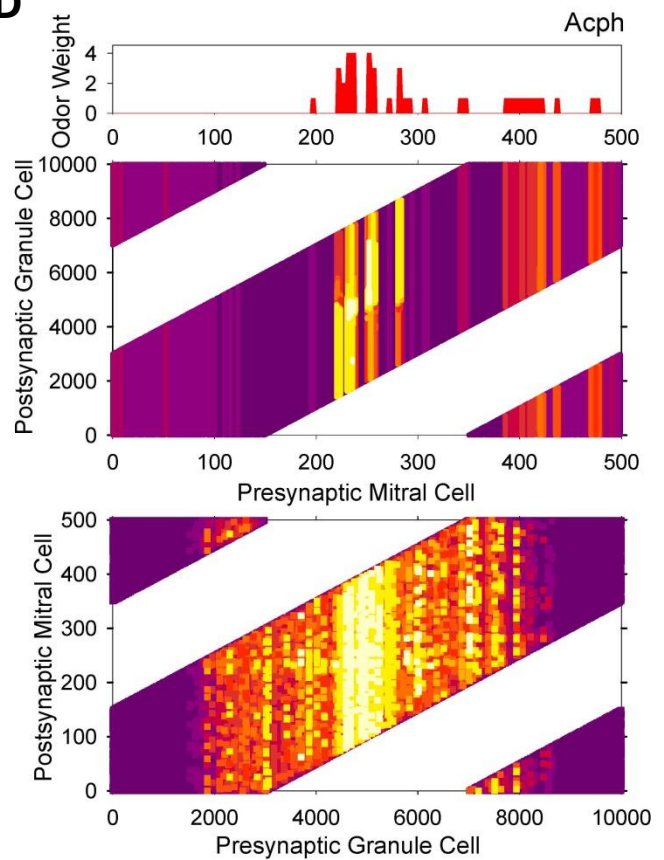

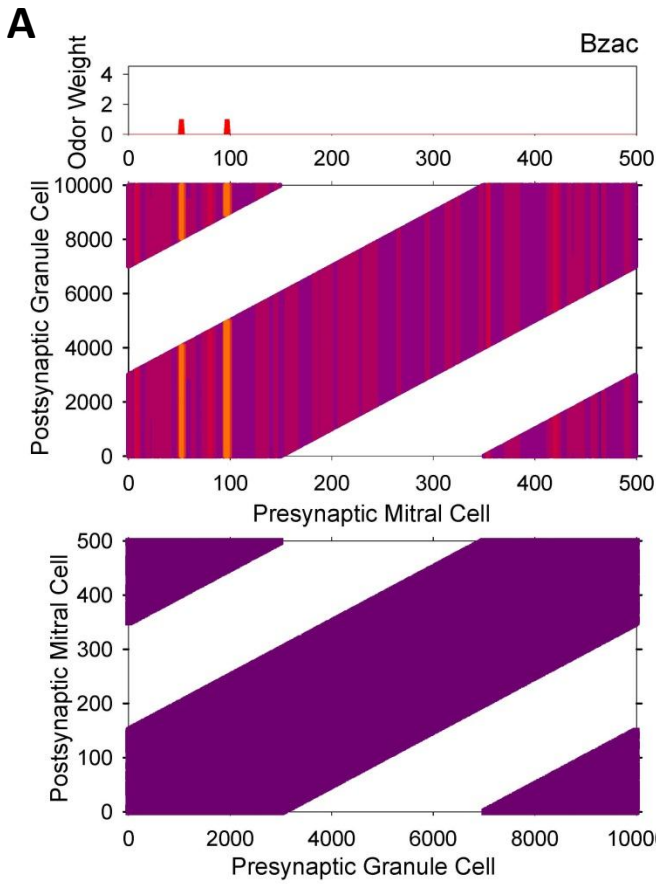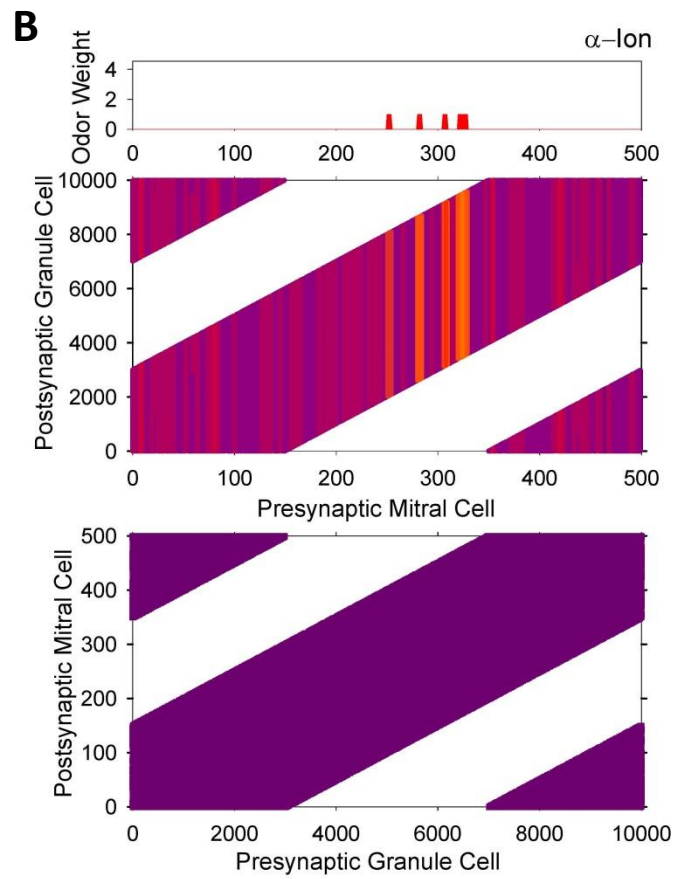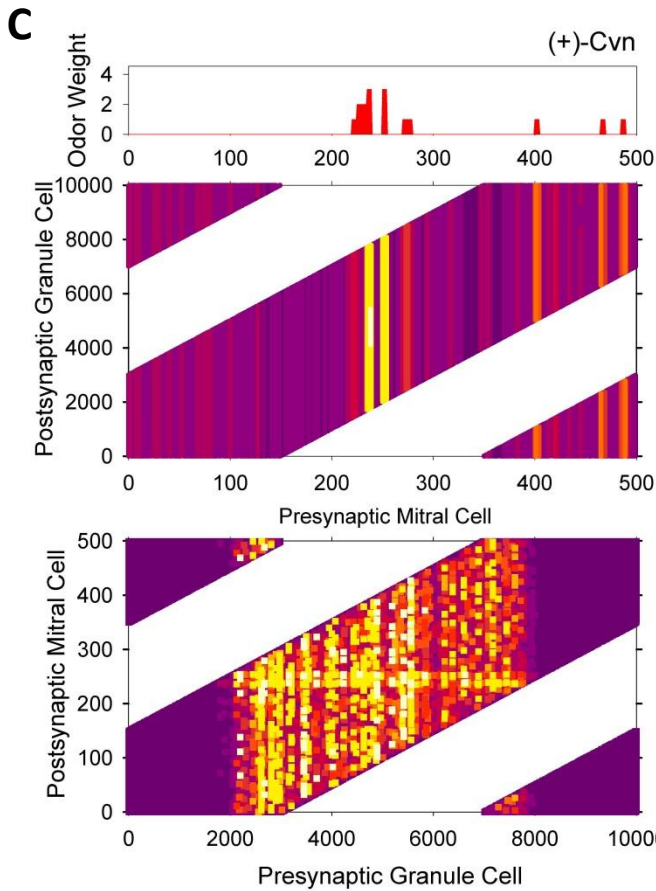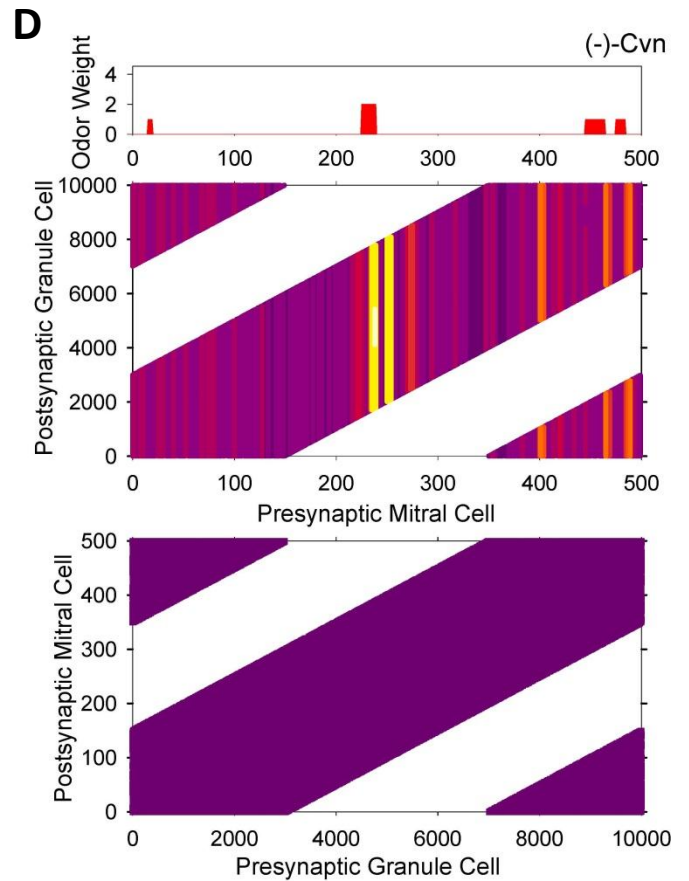

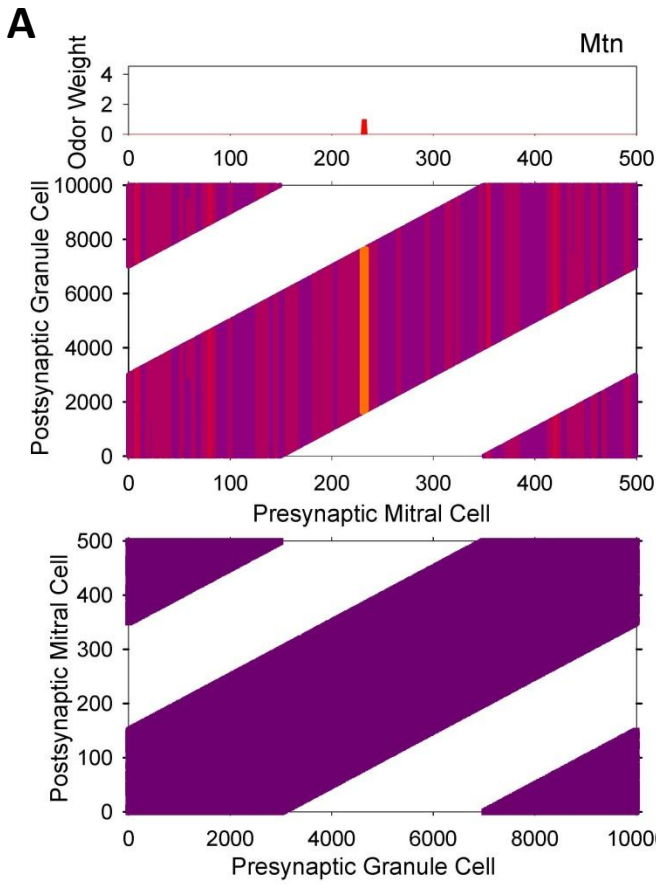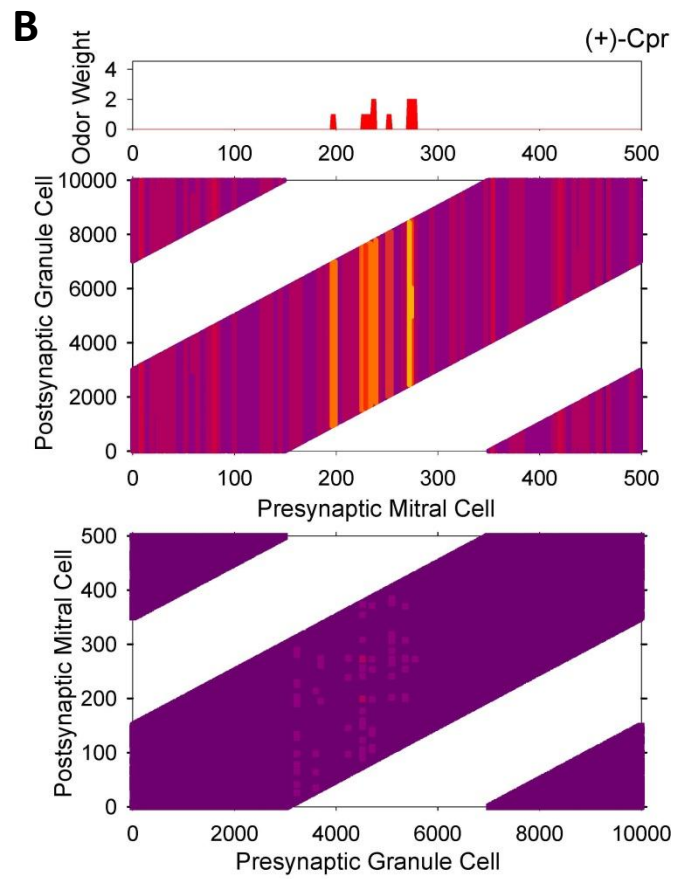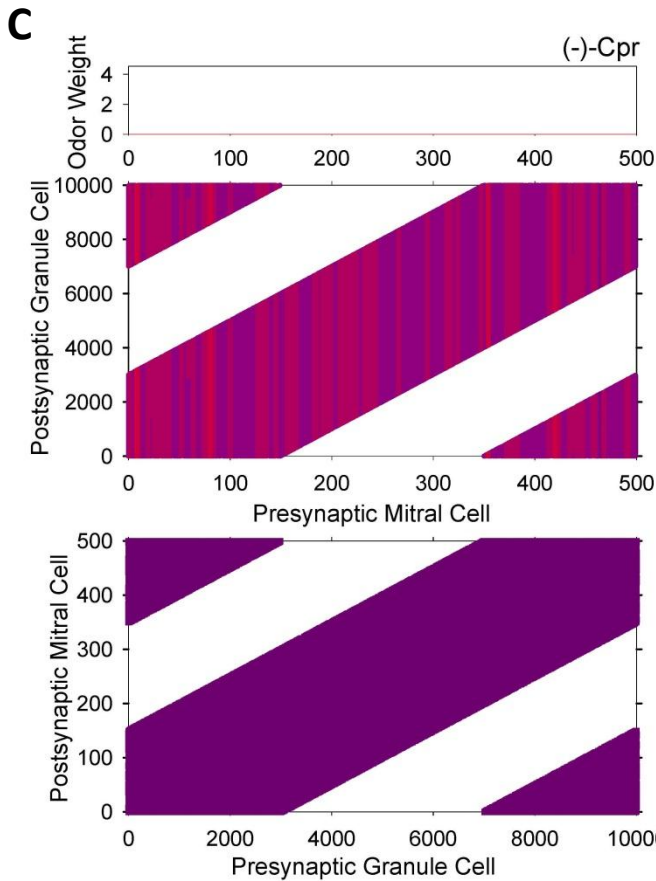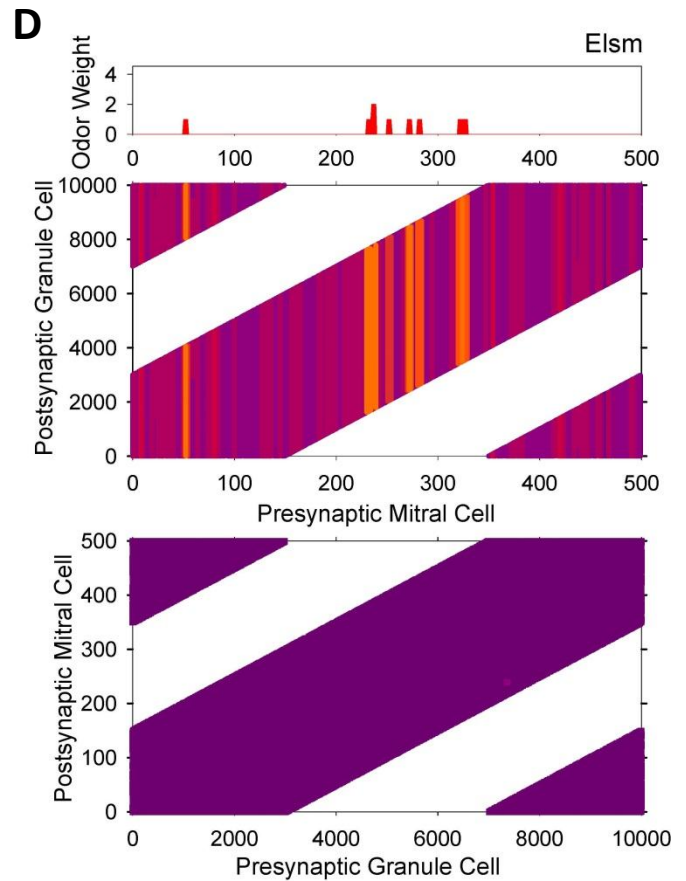

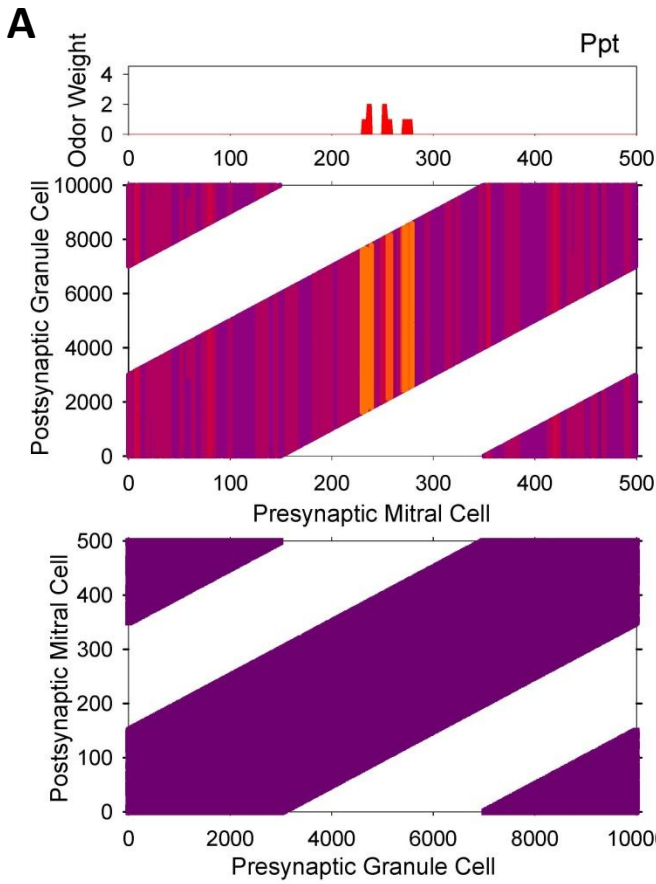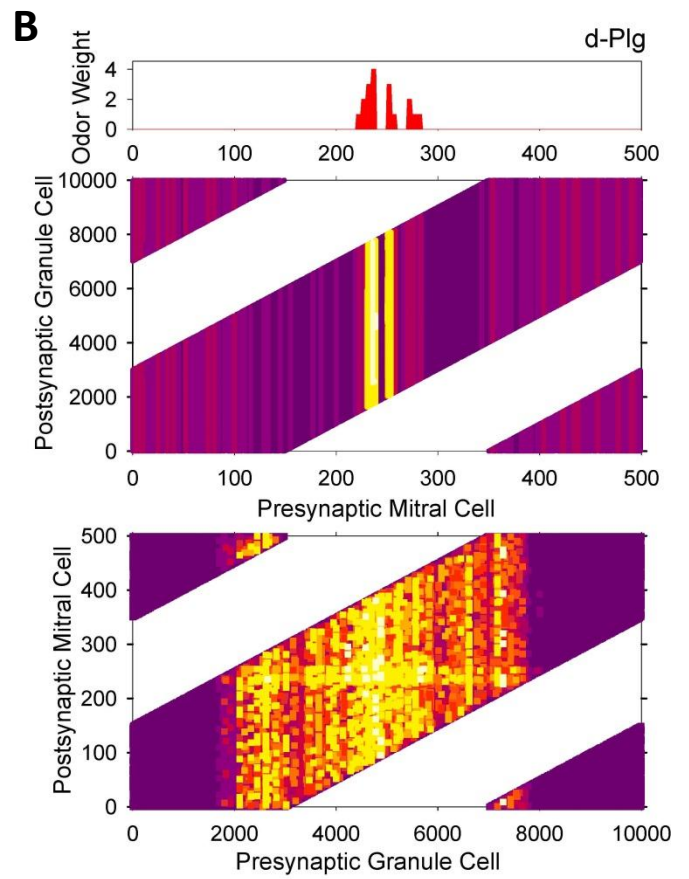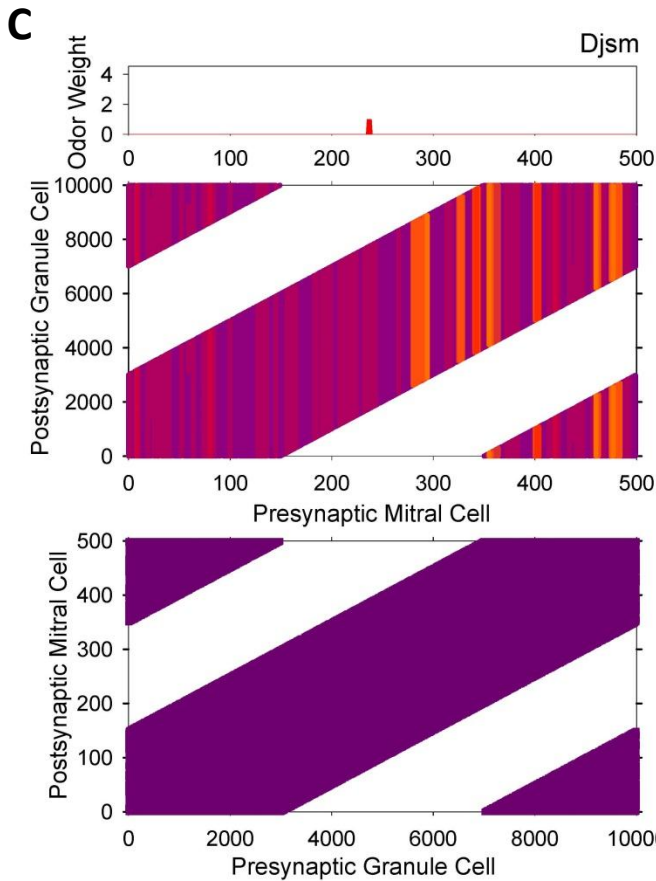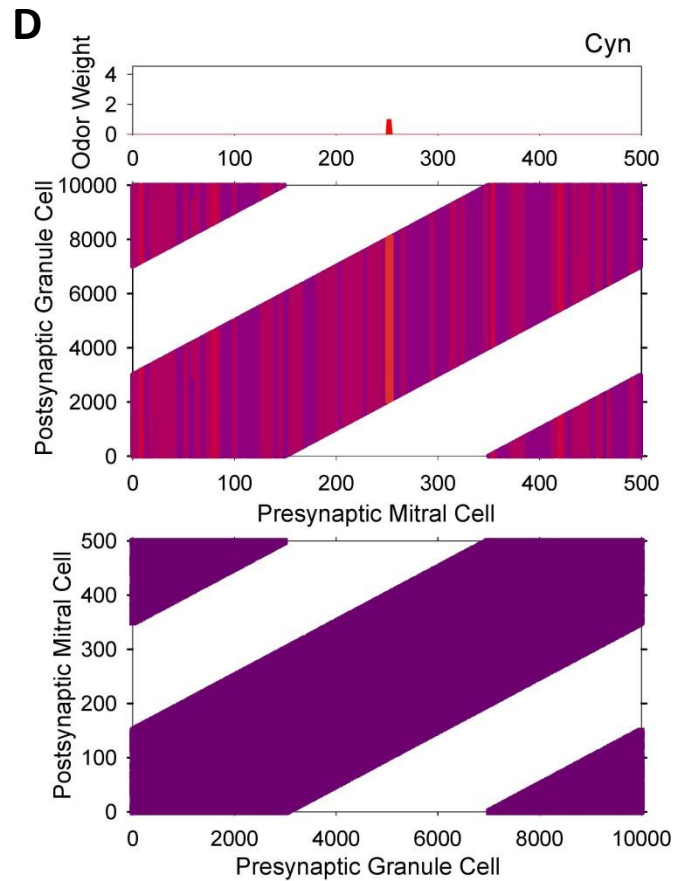



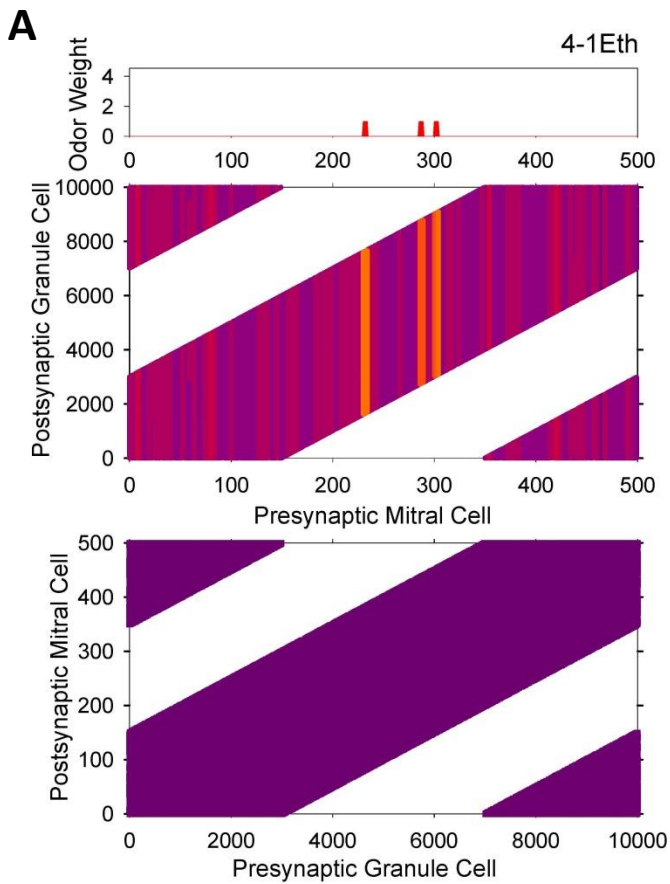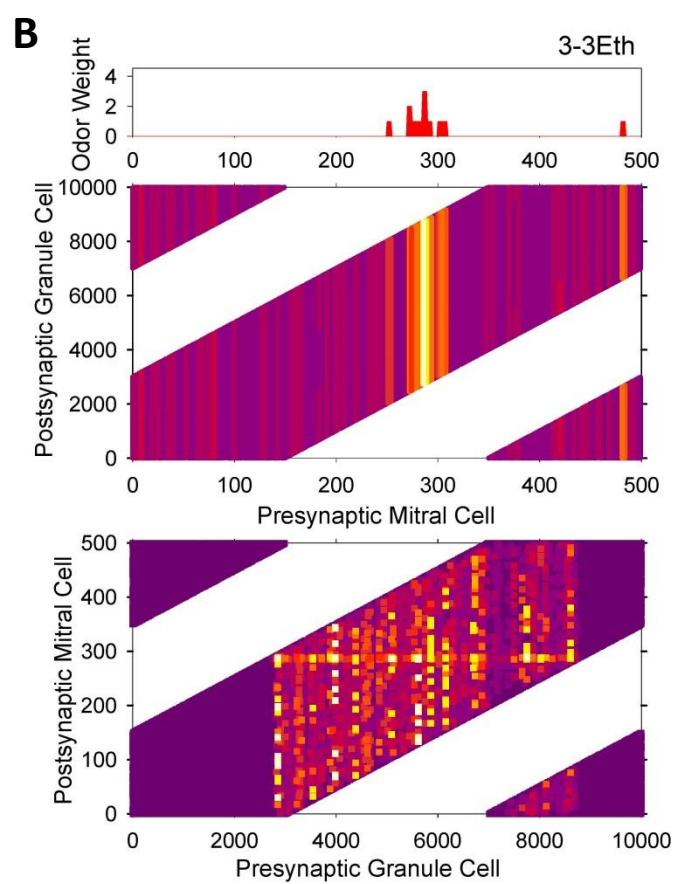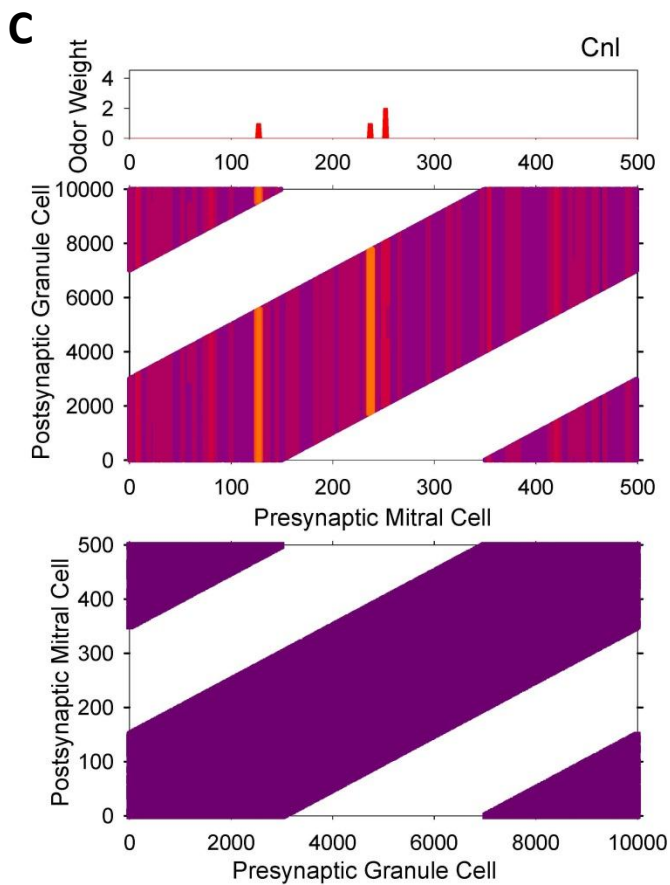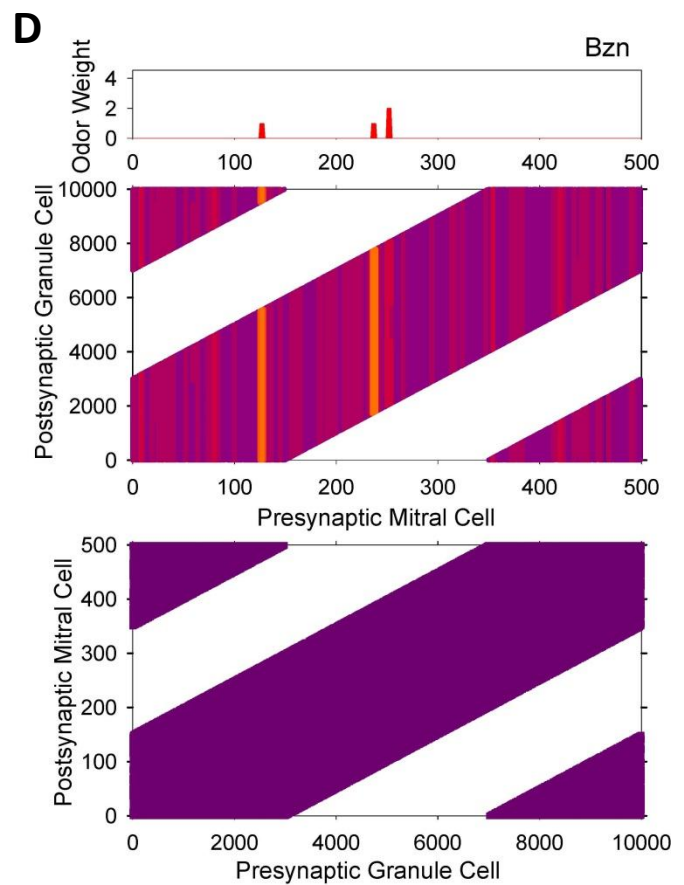

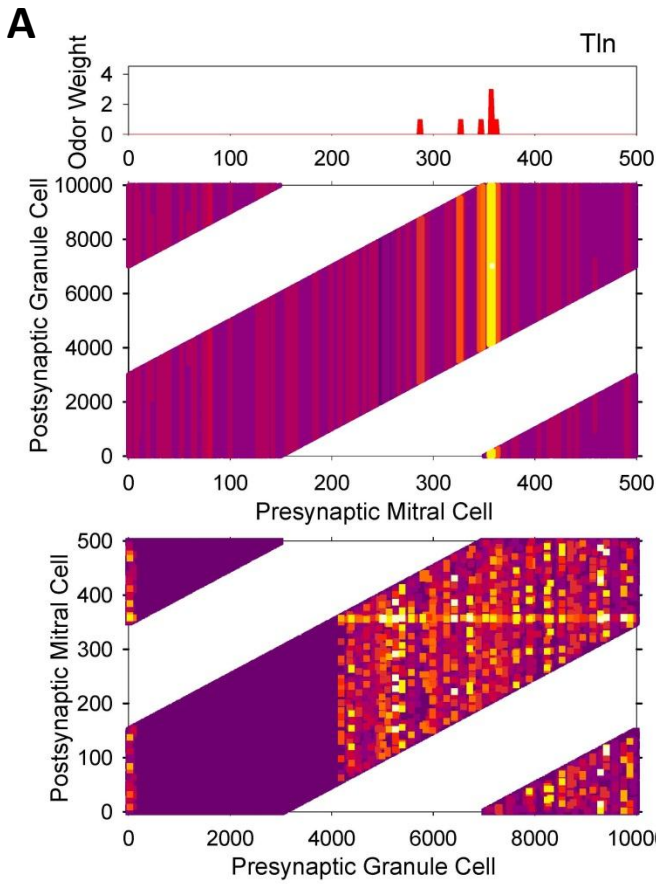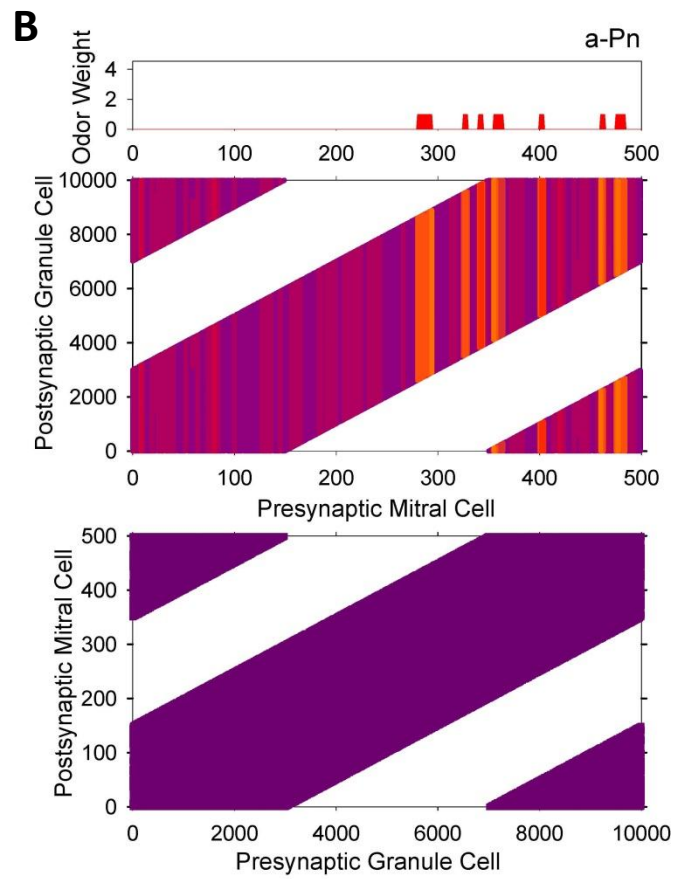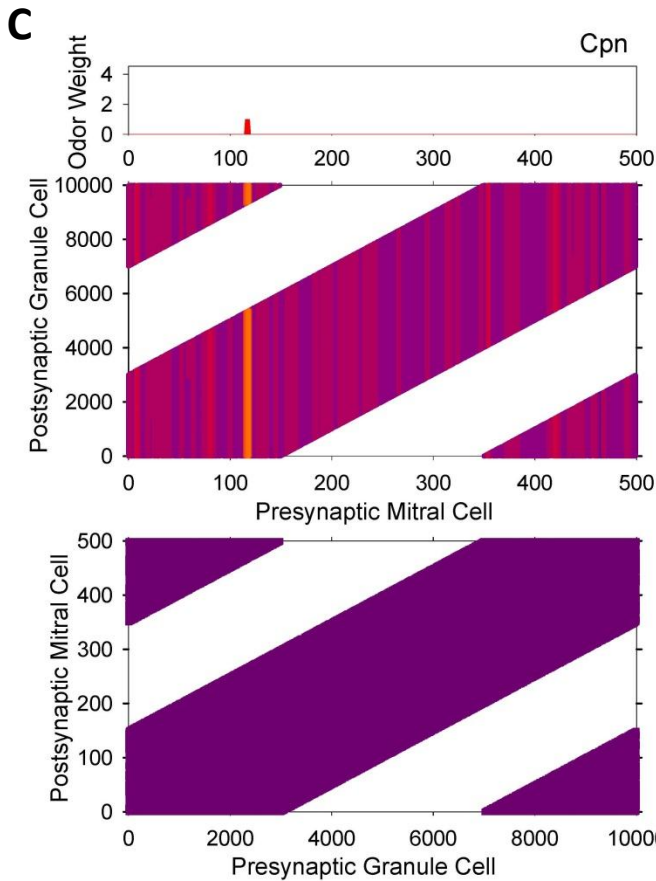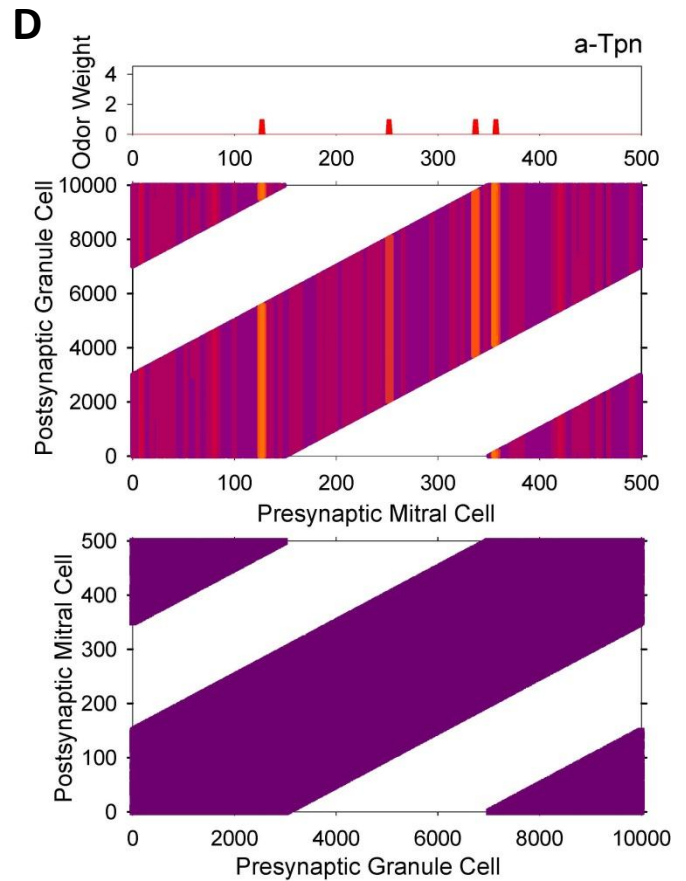

Supplement: pcbi.1003014.s001.pdf [file pcbi.1003014.s001.pdf]
