# Supplementary material for: Sparse Distributed Representation of Odors in a Large-scale Olfactory Bulb Circuit
Source: PubMed Central journal article supplement (PMC3610624; doi:10.1371/journal.pcbi.1003014), 2013-03-28
Supplement: pcbi.1003014.s002.pdf [file pcbi.1003014.s002.pdf]

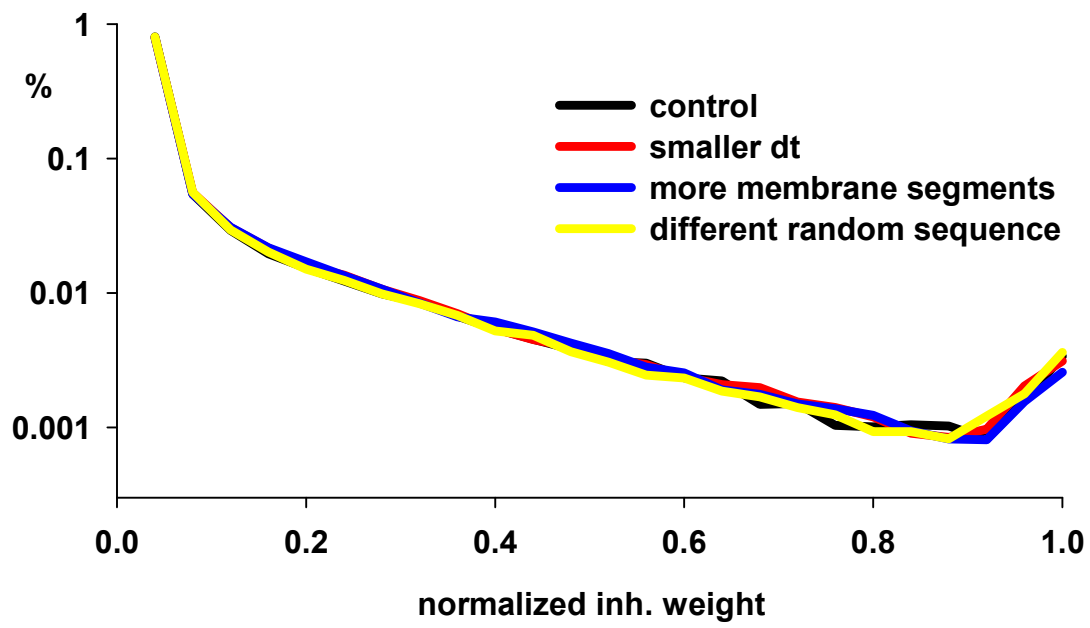

Figure S2
